# Supplementary material
Source: PubMed Central journal article supplement (PMC4256503)
Supplement: supp_M114.042630_mcp.M114.042630-3.pdf [file supp_M114.042630_mcp.M114.042630-3.pdf]

**Supplemental Figure 8.** MS3 Spectra of Identified Inter-linked Peptides Summarized in Supplemental Table 4.

| m/z      | z | P1 m/z  | P1 z | P1 peptide   | P2 m/z  | P2 z | P2 peptide |
|----------|---|---------|------|--------------|---------|------|------------|
| 571.7661 | 4 | 719.858 | 2    | VINDKHDDVMAK | 646.323 | 1    | AMDKK      |

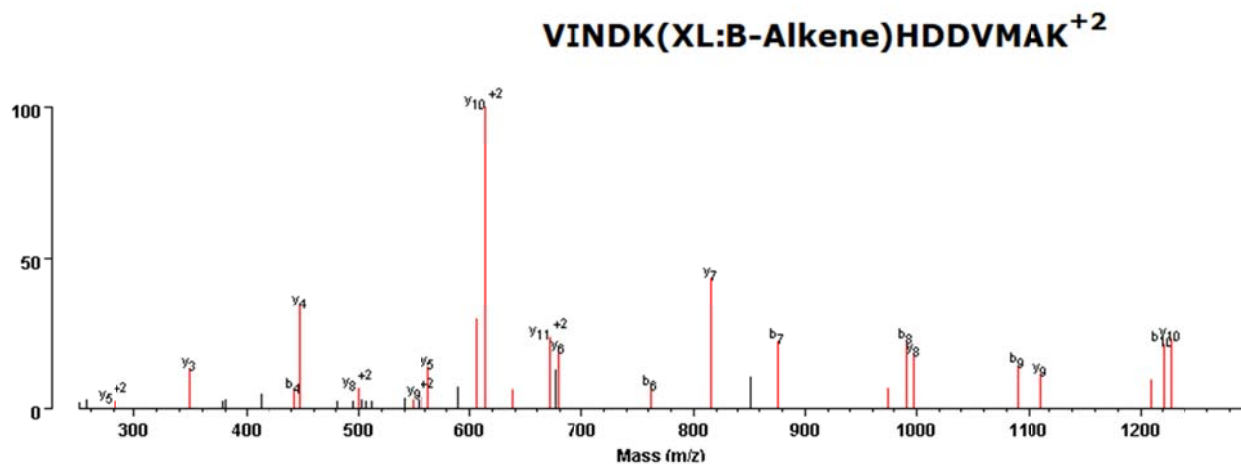

| m/z     | Ion Type                 | Error  |
|---------|--------------------------|--------|
| 282.337 | y,5,+2                   | 0.19   |
| 349.232 | y,3,+1                   | 0.042  |
| 442.327 | b,4,+1                   | 0.097  |
| 448.292 | y,4,+1                   | 0.033  |
| 499.422 | y,8,+2                   | 0.18   |
| 547.494 | y-H <sub>2</sub> O,9,+2  | -0.26  |
| 556.831 | y,9,+2                   | 0.075  |
| 563.125 | y,5,+1                   | -0.16  |
| 605.848 | b-H <sub>2</sub> O,5,+1  | -0.48  |
|         | y-NH <sub>3</sub> ,10,+2 | 0.58   |
| 613.868 | y,10,+2                  | 0.091  |
| 637.768 | b-H <sub>2</sub> O,11,+2 | -0.027 |
|         | b-NH <sub>3</sub> ,11,+2 | -0.52  |
| 670.469 | y,11,+2                  | 0.15   |
| 678.443 | y,6,+1                   | 0.13   |
| 761.402 | b,6,+1                   | 0.0079 |
| 815.266 | y,7,+1                   | -0.11  |
| 876.468 | b,7,+1                   | 0.047  |
| 974.523 | b-NH <sub>3</sub> ,8,+1  | 0.1    |
| 991.548 | b,8,+1                   | 0.1    |
| 997.396 | y,8,+1                   | -0.081 |
| 1090.87 | b,9,+1                   | 0.35   |
| 1112.16 | y,9,+1                   | -0.34  |
| 1209.8  | y-NH <sub>3</sub> ,10,+1 | 0.28   |
| 1221.35 | b,10,+1                  | -0.21  |
| 1226.71 | y,10,+1                  | 0.16   |

### AMDK(XL:B-Alkene)K

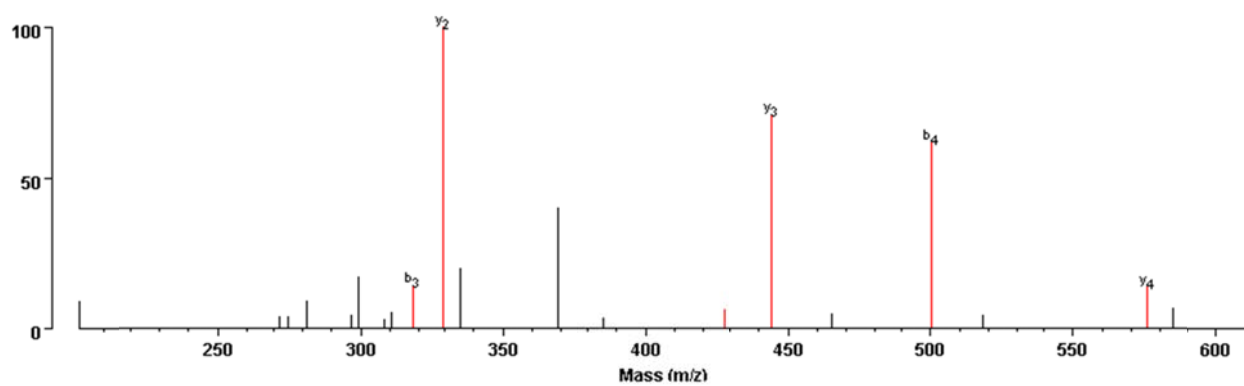

| m/z     | Ion Type                | Error  |
|---------|-------------------------|--------|
| 318.184 | b <sub>3</sub> ,+1      | 0.072  |
| 329.245 | y <sub>2</sub> ,+1      | 0.027  |
| 427.475 | y-NH <sub>3</sub> ,3,+1 | 0.26   |
| 444.221 | y <sub>3</sub> ,+1      | -0.024 |
| 500.13  | b <sub>4</sub> ,+1      | -0.087 |
| 575.362 | y <sub>4</sub> ,+1      | 0.076  |

| m/z      | z | P1 m/z  | P1 z | P1 peptide | P2 m/z  | P2 z | P2 peptide |
|----------|---|---------|------|------------|---------|------|------------|
| 540.2740 | 4 | 436.266 | 2    | TQIISK     | 544.271 | 2    | CVAQASKNR  |

### TQIISK(XL:B-Alkene)K<sup>+2</sup>

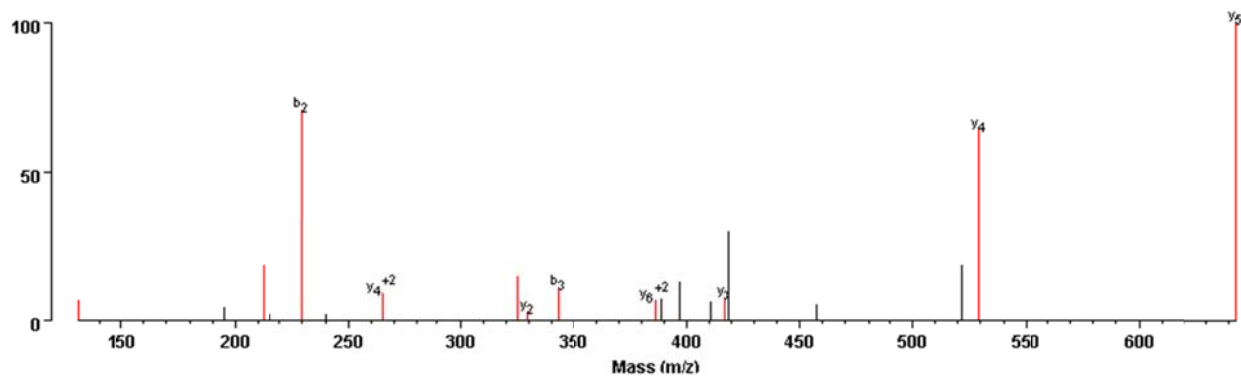

| m/z     | Ion Type   | Error  |
|---------|------------|--------|
| 130.418 | y-NH3,1,+1 | 0.33   |
| 212.538 | b-H2O,2,+1 | 0.44   |
|         | b-NH3,2,+1 | -0.55  |
| 229.967 | b,2,+1     | -0.15  |
| 265.094 | y,4,+2     | -0.077 |
| 324.778 | b-H2O,3,+1 | -0.41  |
| 329.564 | y,2,+1     | 0.35   |
| 343.052 | b,3,+1     | -0.15  |
| 386.121 | y,6,+2     | 0.38   |
| 416.46  | y,3,+1     | 0.21   |
| 529.338 | y,4,+1     | 0.0036 |
| 642.615 | y,5,+1     | 0.2    |

## C(Carbamidomethyl)VAQASK(XL:B-Alkene)NR<sup>+2</sup>

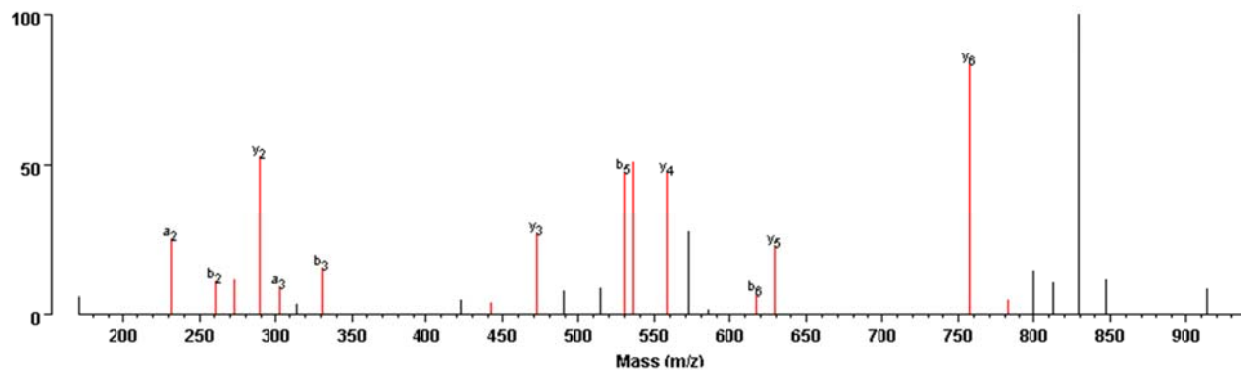

| m/z     | Ion Type                | Error  |
|---------|-------------------------|--------|
| 232.082 | a <sub>2</sub> ,+1      | -0.029 |
| 260.184 | b <sub>2</sub> ,+1      | 0.078  |
| 272.173 | y-NH <sub>3</sub> ,2,+1 | 0.038  |
| 289.229 | y <sub>2</sub> ,+1      | 0.067  |
| 302.946 | a <sub>3</sub> ,+1      | -0.2   |
| 330.685 | b <sub>3</sub> ,+1      | -0.46  |
| 441.86  | b-NH <sub>3</sub> ,4,+1 | -0.32  |
| 471.416 | y <sub>3</sub> ,+1      | 0.15   |
| 530.212 | b <sub>5</sub> ,+1      | -0.027 |
| 535.554 | MH-NH <sub>3</sub> ,,+2 | -0.2   |
|         | MH-H <sub>2</sub> O,,+2 | 0.29   |
| 558.198 | y <sub>4</sub> ,+1      | -0.1   |
| 616.862 | b <sub>6</sub> ,+1      | -0.41  |
| 629.468 | y <sub>5</sub> ,+1      | 0.13   |
| 757.604 | y <sub>6</sub> ,+1      | 0.21   |
| 782.521 | b-NH <sub>3</sub> ,7,+1 | 0.17   |

| m/z      | z | P1 m/z  | P1 z | P1 peptide | P2 m/z  | P2 z | P2 peptide       |
|----------|---|---------|------|------------|---------|------|------------------|
| 746.3817 | 4 | 550.286 | 2    | IMAKYYTR   | 842.469 | 2    | ALSVGLVKGSIDEVDK |

### IMAK(XL:B-Alkene)YYTR<sup>+2</sup>

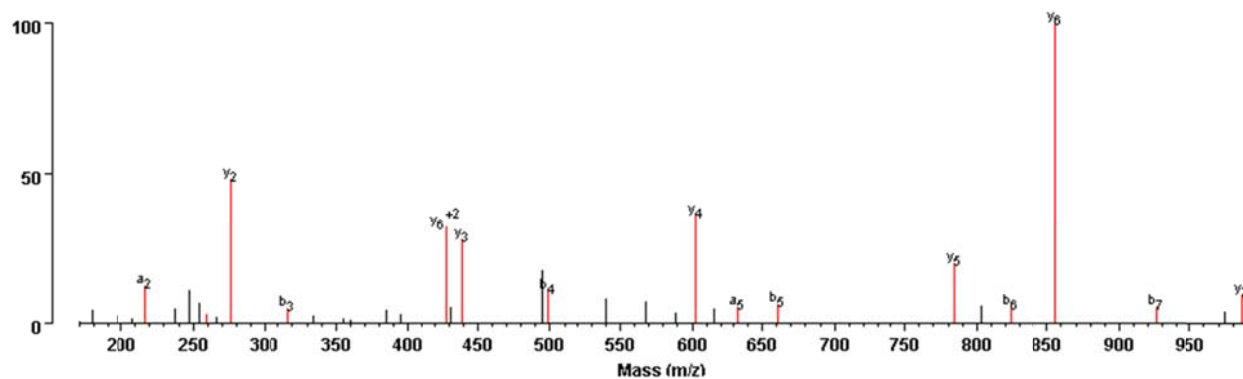

| m/z     | Ion Type   | Error   |
|---------|------------|---------|
| 217.033 | a,2,+1     | -0.1    |
| 258.825 | y-NH3,2,+1 | -0.32   |
| 276.336 | y,2,+1     | 0.17    |
| 316.162 | b,3,+1     | -0.0069 |
| 428.288 | y,6,+2     | 0.066   |
| 439.251 | y,3,+1     | 0.021   |
| 498.656 | b,4,+1     | 0.38    |
| 602.246 | y,4,+1     | -0.047  |
| 633.413 | a,5,+1     | 0.07    |
| 661.082 | b,5,+1     | -0.26   |
| 784.508 | y,5,+1     | 0.11    |
| 824.457 | b,6,+1     | 0.056   |
| 855.326 | y,6,+1     | -0.11   |
| 925.727 | b,7,+1     | 0.28    |
| 986.494 | y,7,+1     | 0.018   |

# ALSVGLVK(XL:B-Alkene)GSIDEVDK<sup>+2</sup>

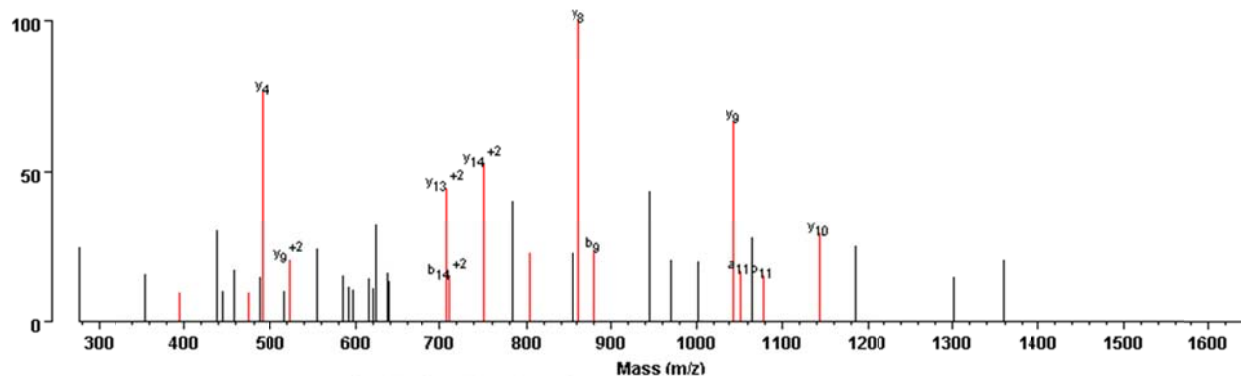

| m/z     | Ion Type    | Error  |
|---------|-------------|--------|
| 395.203 | y-NH3,7,+2  | 0.52   |
| 474.236 | b-H2O,10,+2 | -0.54  |
| 490.34  | y,4,+1      | 0.089  |
| 523.148 | b-H2O,6,+1  | -0.18  |
|         | y,9,+2      | 0.38   |
| 707.222 | y,13,+2     | 0.34   |
| 711.586 | b,14,+2     | -0.31  |
| 750.31  | y,14,+2     | -0.091 |
| 804.293 | b-H2O,8,+1  | -0.2   |
| 862.572 | b-NH3,9,+1  | 0.069  |
|         | y,8,+1      | 0.16   |
| 879.568 | b,9,+1      | 0.038  |
| 1044.48 | y,9,+1      | -0.041 |
| 1051.9  | a,11,+1     | 0.25   |
| 1079.13 | b,11,+1     | -0.52  |
| 1143.51 | y,10,+1     | -0.079 |

| m/z      | z | P1 m/z  | P1 z | P1 peptide | P2 m/z  | P2 z | P2 peptide |
|----------|---|---------|------|------------|---------|------|------------|
| 534.7686 | 4 | 470.249 | 2    | NVGKQDPK   | 499.276 | 2    | NELNAKVR   |

### NVGK(XL:B-Alkene)QDPK<sup>+2</sup>

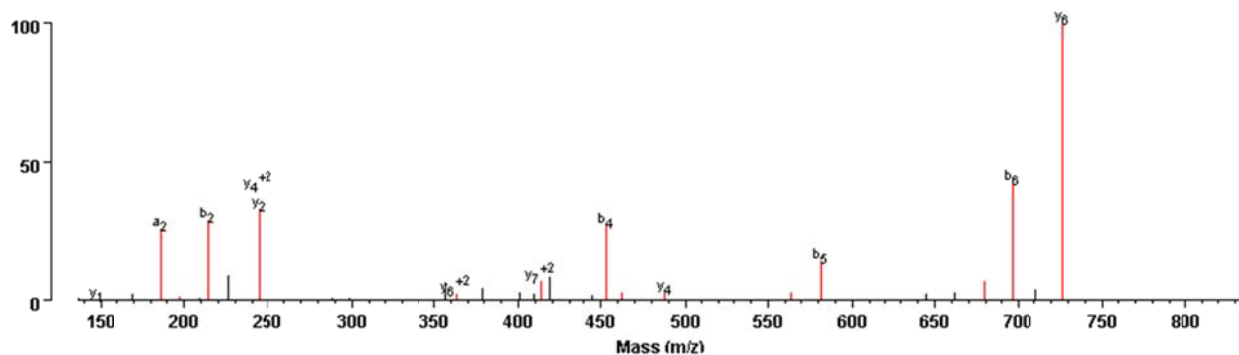

| m/z     | Ion Type   | Error  |
|---------|------------|--------|
| 146.987 | y,1,+1     | -0.13  |
| 186.227 | a,2,+1     | 0.1    |
| 197.307 | b-NH3,2,+1 | 0.21   |
| 214.181 | b,2,+1     | 0.062  |
| 244.326 | y,2,+1     | 0.16   |
|         | y,4,+2     | 0.2    |
| 363.664 | y,6,+2     | -0.029 |
| 413.512 | y,7,+2     | 0.29   |
| 452.891 | b,4,+1     | -0.35  |
| 461.996 | MH-NH3,,+2 | 0.26   |
| 487.489 | y,4,+1     | 0.24   |
| 564.155 | b-NH3,5,+1 | -0.12  |
| 581.355 | b,5,+1     | 0.051  |
| 679.224 | b-NH3,6,+1 | -0.081 |
| 696.23  | b,6,+1     | -0.1   |
| 726.457 | y,6,+1     | 0.079  |

## NELNAK(XL:B-Alkene)VR<sup>+2</sup>

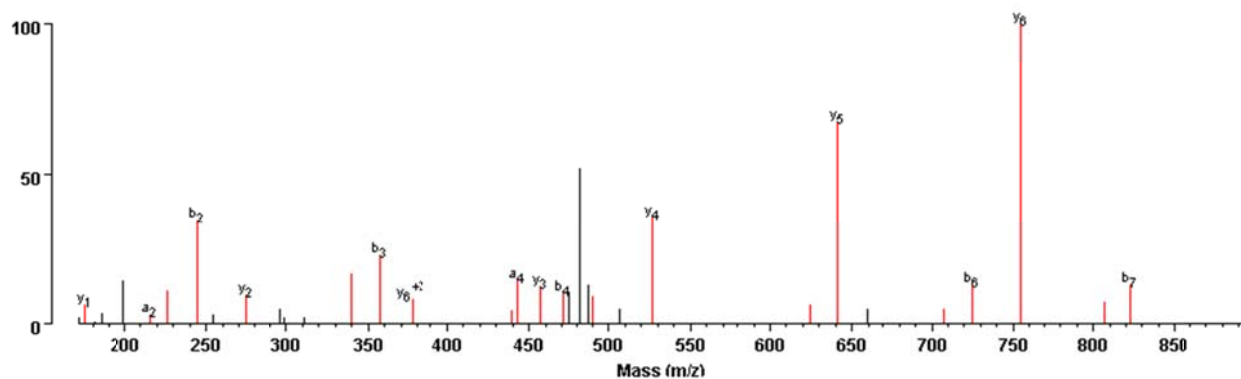

| m/z     | Ion Type   | Error  |
|---------|------------|--------|
| 175.159 | y,1,+1     | 0.04   |
| 215.993 | a,2,+1     | -0.1   |
| 226.208 | b-H2O,2,+1 | 0.13   |
| 244.237 | b,2,+1     | 0.14   |
| 274.298 | y,2,+1     | 0.11   |
| 339.38  | b-H2O,3,+1 | 0.21   |
| 357.189 | b,3,+1     | 0.012  |
| 377.592 | y,6,+2     | -0.14  |
| 439.203 | y-NH3,3,+1 | -0.063 |
| 443.037 | a,4,+1     | -0.19  |
| 456.646 | y,3,+1     | 0.35   |
| 471.188 | b,4,+1     | -0.032 |
| 489.707 | MH-H2O,,+2 | -0.56  |
| 527.069 | y,4,+1     | -0.26  |
| 624.561 | y-NH3,5,+1 | 0.21   |
| 641.359 | y,5,+1     | -0.014 |
| 707.548 | b-NH3,6,+1 | 0.21   |
| 724.467 | b,6,+1     | 0.1    |
| 754.549 | y,6,+1     | 0.092  |
| 806.536 | b-NH3,7,+1 | 0.13   |
| 822.914 | b,7,+1     | -0.52  |



| m/z      | z | P1 m/z  | P1 z | P1 peptide       | P2 m/z  | P2 z | P2 peptide       |
|----------|---|---------|------|------------------|---------|------|------------------|
| 922.4770 | 4 | 878.969 | 2    | VVGSELIQKYLGDGPK | 865.958 | 2    | VSGSELVQKFIGEGAR |

### VVGSELIQK(XL:B-Alkene)YLGDGPK<sup>+2</sup>

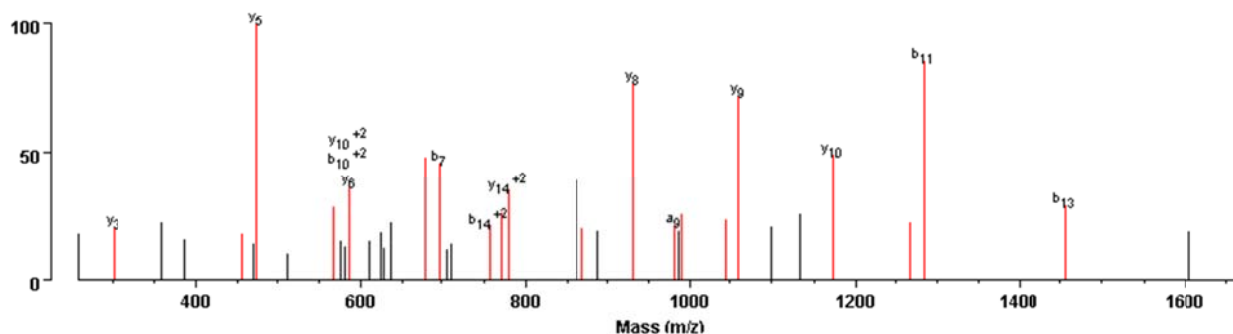

| m/z     | Ion Type    | Error  |
|---------|-------------|--------|
| 301.243 | y,3,+1      | 0.056  |
| 455.463 | y-H2O,5,+1  | 0.24   |
| 473.305 | y,5,+1      | 0.07   |
| 567.094 | b-H2O,6,+1  | -0.22  |
| 586.279 | y,6,+1      | -0.041 |
|         | b,10,+2     | -0.043 |
|         | y,10,+2     | -0.54  |
| 680.442 | b-H2O,7,+1  | 0.044  |
| 698.343 | b,7,+1      | -0.065 |
|         | y-H2O,12,+2 | -0.53  |
| 757.095 | b,14,+2     | -0.3   |
| 771.302 | y-NH3,14,+2 | -0.094 |
|         | y-H2O,14,+2 | 0.4    |
| 780.169 | y,14,+2     | 0.26   |
| 869.868 | MH-H2O,,+2  | -0.1   |
|         | MH-NH3,,+2  | -0.6   |
| 931.639 | y,8,+1      | 0.15   |
| 980.373 | a,9,+1      | -0.2   |
| 990.182 | b-H2O,9,+1  | -0.38  |
| 1042.47 | y-NH3,9,+1  | -0.05  |
| 1059.35 | y,9,+1      | -0.2   |
| 1172.72 | y,10,+1     | 0.089  |
| 1267.57 | b-NH3,11,+1 | -0.12  |
|         | y-H2O,11,+1 | -0.13  |
| 1284.37 | b,11,+1     | -0.35  |
| 1456.6  | b,13,+1     | -0.17  |

## VSGSELVQK(XL:B-Alkene)FIGEGAR<sup>+2</sup>

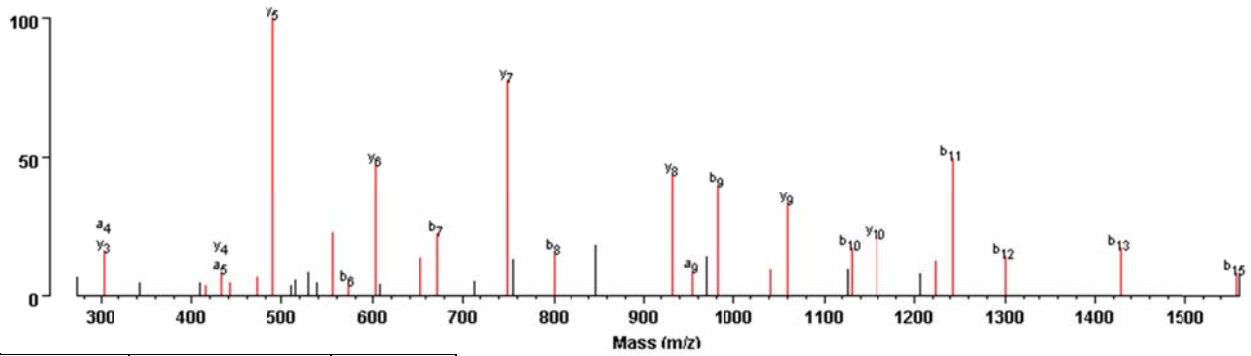

| m/z     | Ion Type    | Error   |
|---------|-------------|---------|
| 303.257 | y,3,+1      | 0.079   |
|         | a,4,+1      | 0.091   |
| 415.533 | y-NH3,4,+1  | 0.34    |
| 432.079 | a,5,+1      | -0.13   |
|         | y,4,+1      | -0.14   |
| 442.27  | b-H2O,5,+1  | 0.077   |
| 471.055 | y-H2O,5,+1  | -0.18   |
| 489.358 | y,5,+1      | 0.12    |
| 555.207 | b-H2O,6,+1  | -0.07   |
| 573.181 | b,6,+1      | -0.11   |
| 602.361 | y,6,+1      | 0.035   |
| 654.367 | b-H2O,7,+1  | 0.021   |
| 672.195 | b,7,+1      | -0.16   |
| 749.617 | y,7,+1      | 0.22    |
| 800.325 | b,8,+1      | -0.09   |
| 931.392 | y,8,+1      | -0.11   |
| 954.177 | a,9,+1      | -0.35   |
| 982.417 | b,9,+1      | -0.1    |
| 1041.48 | y-H2O,9,+1  | -0.068  |
| 1059.48 | y,9,+1      | -0.078  |
| 1129.69 | b,10,+1     | 0.1     |
| 1158.68 | y,10,+1     | 0.053   |
| 1224.3  | b-H2O,11,+1 | -0.36   |
| 1242.46 | b,11,+1     | -0.21   |
| 1299.72 | b,12,+1     | 0.026   |
| 1428.73 | b,13,+1     | -0.0069 |
| 1556.49 | b,15,+1     | -0.31   |

| m/z      | z | P1 m/z  | P1 z | P1 peptide  | P2 m/z  | P2 z | P2 peptide |
|----------|---|---------|------|-------------|---------|------|------------|
| 659.8259 | 4 | 720.366 | 2    | EFLHAQEEVKR | 499.274 | 2    | NELNAKVR   |

### EFLHAQEEVK(XL:B-Alkene)R<sup>+2</sup>

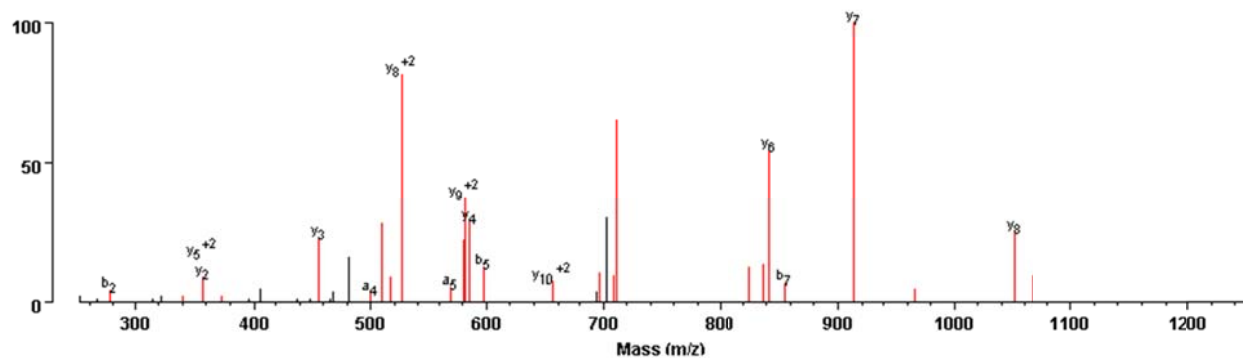

| m/z     | Ion Type   | Error  |
|---------|------------|--------|
| 277.259 | b,2,+1     | 0.14   |
| 339.775 | y-NH3,2,+1 | -0.42  |
| 357.394 | y,2,+1     | 0.17   |
|         | y,5,+2     | -0.3   |
| 372.395 | b-H2O,3,+1 | 0.2    |
| 456.452 | y,3,+1     | 0.16   |
| 499.525 | a,4,+1     | 0.26   |
| 509.347 | b-H2O,4,+1 | 0.096  |
| 516.857 | y-H2O,8,+2 | 0.092  |
|         | y-NH3,8,+2 | -0.4   |
| 525.88  | y,8,+2     | 0.11   |
| 570.412 | a,5,+1     | 0.11   |
| 580.315 | b-H2O,5,+1 | 0.027  |
| 582.479 | y,9,+2     | 0.17   |
| 585.567 | y,4,+1     | 0.23   |
| 598.27  | b,5,+1     | -0.028 |
| 656.126 | y,10,+2    | 0.28   |
| 696.269 | y-H2O,5,+1 | -0.099 |
| 708.408 | b-H2O,6,+1 | 0.062  |
| 711.681 | MH-NH3,,+2 | -0.17  |
|         | MH-H2O,,+2 | 0.32   |
| 825.569 | y-NH3,6,+1 | 0.16   |
| 837.647 | b-H2O,7,+1 | 0.26   |
| 842.514 | y,6,+1     | 0.077  |
| 855.308 | b,7,+1     | -0.092 |
| 913.615 | y,7,+1     | 0.14   |

|         |                          |       |
|---------|--------------------------|-------|
| 966.514 | b-H <sub>2</sub> O,8,+1  | 0.082 |
| 1050.68 | y,8,+1                   | 0.15  |
| 1066.55 | b-NH <sub>3</sub> ,9,+1  | 0.066 |
| 1247.72 | b-H <sub>2</sub> O,10,+1 | 0.11  |

### NELNAK(XL:B-Alkene)VR<sup>+2</sup>

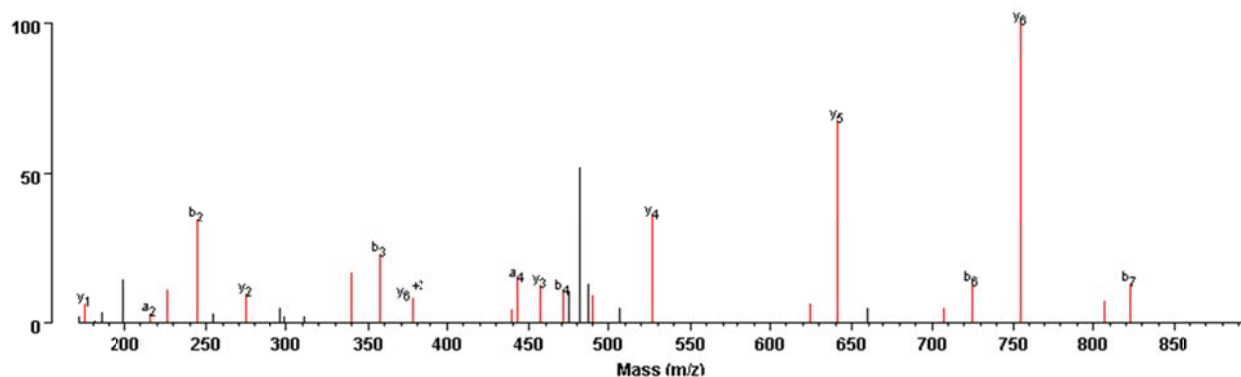

| m/z     | Ion Type                | Error  |
|---------|-------------------------|--------|
| 175.159 | y,1,+1                  | 0.04   |
| 215.993 | a,2,+1                  | -0.1   |
| 226.208 | b-H <sub>2</sub> O,2,+1 | 0.13   |
| 244.237 | b,2,+1                  | 0.14   |
| 274.298 | y,2,+1                  | 0.11   |
| 339.38  | b-H <sub>2</sub> O,3,+1 | 0.21   |
| 357.189 | b,3,+1                  | 0.012  |
| 377.592 | y,6,+2                  | -0.14  |
| 439.203 | y-NH <sub>3</sub> ,3,+1 | -0.063 |
| 443.037 | a,4,+1                  | -0.19  |
| 456.646 | y,3,+1                  | 0.35   |
| 471.188 | b,4,+1                  | -0.032 |
| 489.707 | MH-H <sub>2</sub> O,,+2 | -0.56  |
| 527.069 | y,4,+1                  | -0.26  |
| 624.561 | y-NH <sub>3</sub> ,5,+1 | 0.21   |
| 641.359 | y,5,+1                  | -0.014 |
| 707.548 | b-NH <sub>3</sub> ,6,+1 | 0.21   |
| 724.467 | b,6,+1                  | 0.1    |
| 754.549 | y,6,+1                  | 0.092  |
| 806.536 | b-NH <sub>3</sub> ,7,+1 | 0.13   |
| 822.914 | b,7,+1                  | -0.52  |

| m/z      | z | P1 m/z  | P1 z | P1 peptide      | P2 m/z  | P2 z | P2 peptide       |
|----------|---|---------|------|-----------------|---------|------|------------------|
| 937.9707 | 4 | 909.974 | 2    | VVGSEFVQKYLGEGR | 865.959 | 2    | VSGSELVQKFIGEGAR |

### VVGSEFVQK(XL:B-Alkene)YLGEGR<sup>+2</sup>

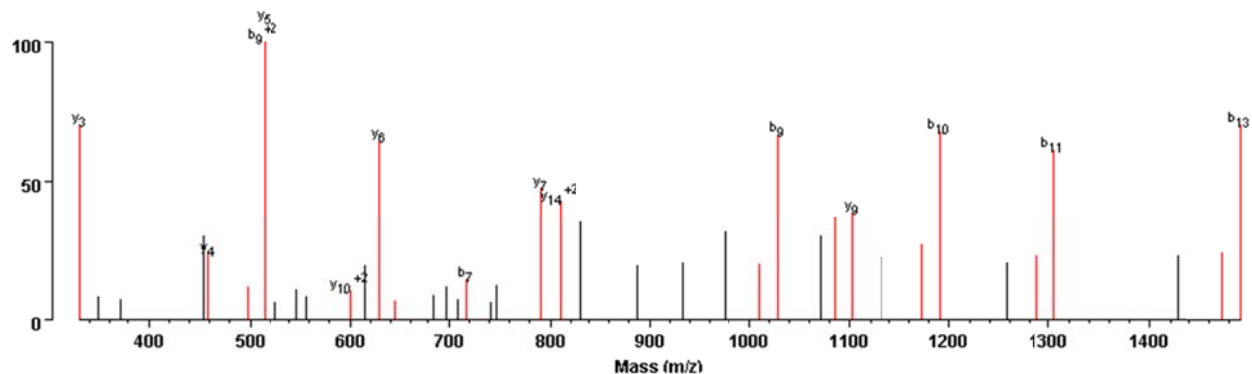

| m/z     | Ion Type                 | Error   |
|---------|--------------------------|---------|
| 1490.29 | b,13,+1                  | -0.46   |
| 1173.21 | b-H <sub>2</sub> O,10,+1 | -0.38   |
| 1191.23 | b,10,+1                  | -0.37   |
|         | y,5,+1                   | -0.32   |
| 718.094 | b,7,+1                   | -0.28   |
| 1472.46 | b-H <sub>2</sub> O,13,+1 | -0.28   |
| 1304.54 | b,11,+1                  | -0.15   |
| 1287.52 | b-NH <sub>3</sub> ,11,+1 | -0.14   |
| 628.243 | y,6,+1                   | -0.098  |
| 791.33  | y,7,+1                   | -0.075  |
| 1101.51 | y,9,+1                   | -0.059  |
| 601.262 | b-H <sub>2</sub> O,6,+1  | -0.036  |
| 1028.54 | b,9,+1                   | -0.0011 |
| 497.306 | y-H <sub>2</sub> O,5,+1  | 0.059   |
| 1084.65 | y-NH <sub>3</sub> ,9,+1  | 0.11    |
| 1010.68 | b-H <sub>2</sub> O,9,+1  | 0.15    |
| 329.349 | y,3,+1                   | 0.16    |
| 514.933 | b,9,+2                   | 0.16    |
| 811.177 | y,14,+2                  | 0.27    |
| 458.517 | y,4,+1                   | 0.28    |
| 644.659 | b-NH <sub>3</sub> ,11,+2 | 0.32    |
|         | y,10,+2                  | 0.44    |

## VSGSELVQK(XL:B-Alkene)FIGEGAR<sup>+2</sup>

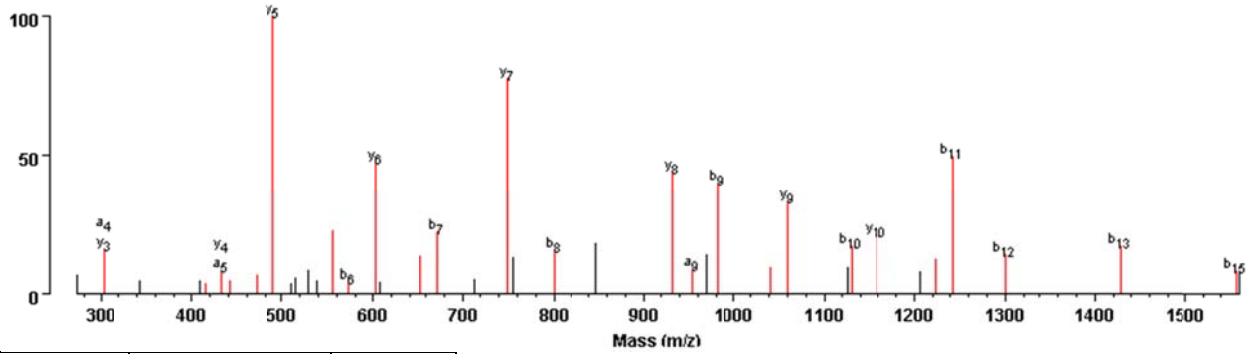

| m/z     | Ion Type    | Error   |
|---------|-------------|---------|
| 303.257 | y,3,+1      | 0.079   |
|         | a,4,+1      | 0.091   |
| 415.533 | y-NH3,4,+1  | 0.34    |
| 432.079 | a,5,+1      | -0.13   |
|         | y,4,+1      | -0.14   |
| 442.27  | b-H2O,5,+1  | 0.077   |
| 471.055 | y-H2O,5,+1  | -0.18   |
| 489.358 | y,5,+1      | 0.12    |
| 555.207 | b-H2O,6,+1  | -0.07   |
| 573.181 | b,6,+1      | -0.11   |
| 602.361 | y,6,+1      | 0.035   |
| 654.367 | b-H2O,7,+1  | 0.021   |
| 672.195 | b,7,+1      | -0.16   |
| 749.617 | y,7,+1      | 0.22    |
| 800.325 | b,8,+1      | -0.09   |
| 931.392 | y,8,+1      | -0.11   |
| 954.177 | a,9,+1      | -0.35   |
| 982.417 | b,9,+1      | -0.1    |
| 1041.48 | y-H2O,9,+1  | -0.068  |
| 1059.48 | y,9,+1      | -0.078  |
| 1129.69 | b,10,+1     | 0.1     |
| 1158.68 | y,10,+1     | 0.053   |
| 1224.3  | b-H2O,11,+1 | -0.36   |
| 1242.46 | b,11,+1     | -0.21   |
| 1299.72 | b,12,+1     | 0.026   |
| 1428.73 | b,13,+1     | -0.0069 |
| 1556.49 | b,15,+1     | -0.31   |

| m/z      | z | P1 m/z  | P1 z | P1 peptide | P2 m/z  | P2 z | P2 peptide       |
|----------|---|---------|------|------------|---------|------|------------------|
| 772.3973 | 4 | 578.828 | 2    | FIVKATNGPR | 865.956 | 2    | VSGSELVQKFIGEGAR |

### FIVK(XL:B-Alkene)ATNGPR<sup>+2</sup>

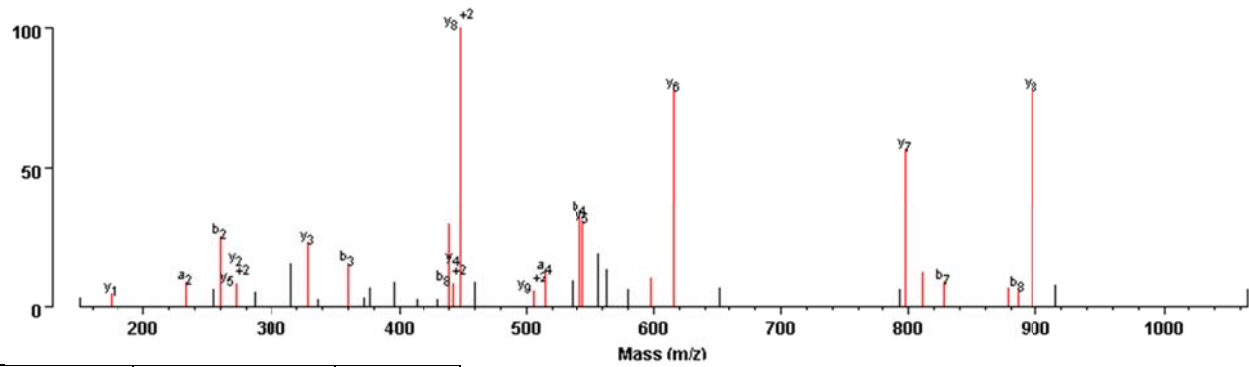

| m/z     | Ion Type                | Error  |
|---------|-------------------------|--------|
| 175.184 | y <sub>1</sub> ,+1      | 0.065  |
| 233.004 | a <sub>2</sub> ,+1      | -0.16  |
| 260.698 | b <sub>2</sub> ,+1      | -0.46  |
| 272.425 | y <sub>5</sub> ,+2      | -0.22  |
|         | y <sub>2</sub> ,+1      | 0.25   |
| 329.375 | y <sub>3</sub> ,+1      | 0.18   |
| 359.892 | b <sub>3</sub> ,+1      | -0.34  |
| 440.1   | y-NH <sub>3</sub> ,8,+2 | -0.14  |
|         | y-H <sub>2</sub> O,8,+2 | 0.35   |
| 443.373 | b <sub>8</sub> ,+2      | 0.13   |
|         | y <sub>4</sub> ,+1      | 0.14   |
| 448.939 | y <sub>8</sub> ,+2      | 0.19   |
| 505.886 | y <sub>9</sub> ,+2      | 0.59   |
| 514.258 | a <sub>4</sub> ,+1      | -0.081 |
| 541.968 | b <sub>4</sub> ,+1      | -0.37  |
| 544.158 | y <sub>5</sub> ,+1      | -0.13  |
| 598.427 | y-NH <sub>3</sub> ,6,+1 | 0.13   |
| 615.526 | y <sub>6</sub> ,+1      | 0.21   |
| 797.455 | y <sub>7</sub> ,+1      | 0.029  |
| 811.47  | b-NH <sub>3</sub> ,7,+1 | 0.035  |
| 828.127 | b <sub>7</sub> ,+1      | -0.33  |
| 878.353 | y-H <sub>2</sub> O,8,+1 | -0.13  |
| 885.748 | b <sub>8</sub> ,+1      | 0.27   |
| 896.721 | y <sub>8</sub> ,+1      | 0.23   |

# VSGSELVQK(XL:B-Alkene)FIGEGAR<sup>+2</sup>

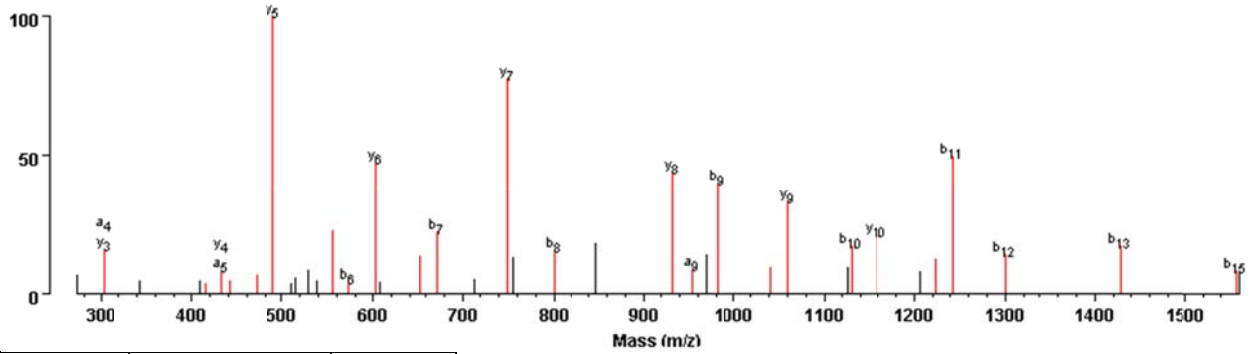

| m/z     | Ion Type    | Error   |
|---------|-------------|---------|
| 303.257 | y,3,+1      | 0.079   |
|         | a,4,+1      | 0.091   |
| 415.533 | y-NH3,4,+1  | 0.34    |
| 432.079 | a,5,+1      | -0.13   |
|         | y,4,+1      | -0.14   |
| 442.27  | b-H2O,5,+1  | 0.077   |
| 471.055 | y-H2O,5,+1  | -0.18   |
| 489.358 | y,5,+1      | 0.12    |
| 555.207 | b-H2O,6,+1  | -0.07   |
| 573.181 | b,6,+1      | -0.11   |
| 602.361 | y,6,+1      | 0.035   |
| 654.367 | b-H2O,7,+1  | 0.021   |
| 672.195 | b,7,+1      | -0.16   |
| 749.617 | y,7,+1      | 0.22    |
| 800.325 | b,8,+1      | -0.09   |
| 931.392 | y,8,+1      | -0.11   |
| 954.177 | a,9,+1      | -0.35   |
| 982.417 | b,9,+1      | -0.1    |
| 1041.48 | y-H2O,9,+1  | -0.068  |
| 1059.48 | y,9,+1      | -0.078  |
| 1129.69 | b,10,+1     | 0.1     |
| 1158.68 | y,10,+1     | 0.053   |
| 1224.3  | b-H2O,11,+1 | -0.36   |
| 1242.46 | b,11,+1     | -0.21   |
| 1299.72 | b,12,+1     | 0.026   |
| 1428.73 | b,13,+1     | -0.0069 |
| 1556.49 | b,15,+1     | -0.31   |



| m/z      | z | P1 m/z  | P1 z | P1 peptide | P2 m/z  | P2 z | P2 peptide  |
|----------|---|---------|------|------------|---------|------|-------------|
| 653.3353 | 4 | 574.845 | 2    | LDILKIHSR  | 631.816 | 2    | TMDVSKLSAEK |

### LDILK(XL:B-Alkene)IHSR<sup>+2</sup>

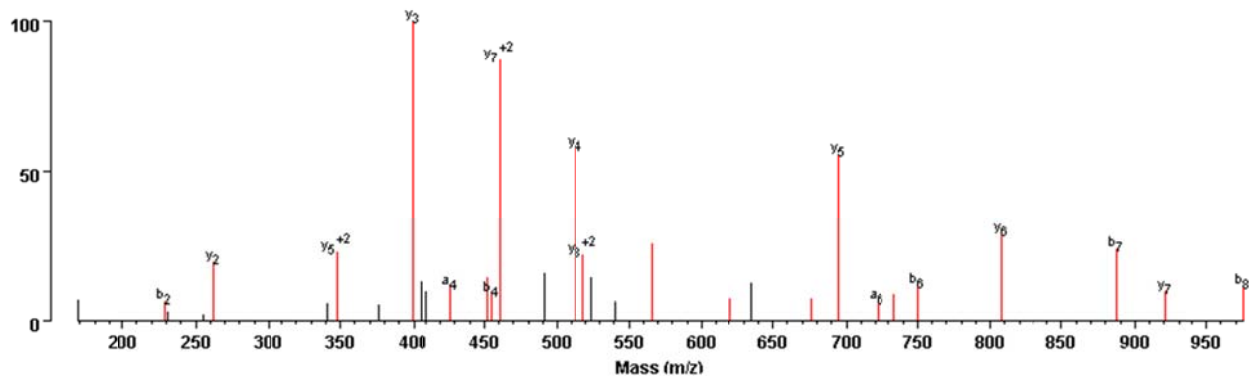

| m/z     | Ion Type                | Error  |
|---------|-------------------------|--------|
| 228.984 | b <sub>2</sub> ,+1      | -0.13  |
| 262.172 | y <sub>2</sub> ,+1      | 0.021  |
| 347.721 | y <sub>5</sub> ,+2      | 0.018  |
| 399.345 | y <sub>3</sub> ,+1      | 0.14   |
| 426.999 | a <sub>4</sub> ,+1      | -0.29  |
| 452.057 | y-NH <sub>3</sub> ,7,+2 | -0.22  |
|         | y-H <sub>2</sub> O,7,+2 | 0.27   |
| 455.252 | b <sub>4</sub> ,+1      | -0.034 |
| 460.853 | y <sub>7</sub> ,+2      | 0.066  |
| 512.429 | y <sub>4</sub> ,+1      | 0.14   |
| 518.27  | y <sub>8</sub> ,+2      | -0.031 |
| 565.916 | MH-H <sub>2</sub> O,,+2 | 0.078  |
|         | MH-NH <sub>3</sub> ,,+2 | -0.41  |
| 620.234 | b-NH <sub>3</sub> ,5,+1 | -0.13  |
| 676.234 | y-H <sub>2</sub> O,5,+1 | -0.15  |
| 694.378 | y <sub>5</sub> ,+1      | -0.021 |
| 722.086 | a <sub>6</sub> ,+1      | -0.4   |
| 733.315 | b-NH <sub>3</sub> ,6,+1 | -0.13  |
| 750.299 | b <sub>6</sub> ,+1      | -0.18  |
| 807.44  | y <sub>6</sub> ,+1      | -0.044 |
| 887.596 | b <sub>7</sub> ,+1      | 0.061  |
| 920.913 | y <sub>7</sub> ,+1      | 0.35   |
| 974.697 | b <sub>8</sub> ,+1      | 0.13   |

## TMDVSK(XL:B-Alkene)LSAEK<sup>+2</sup>

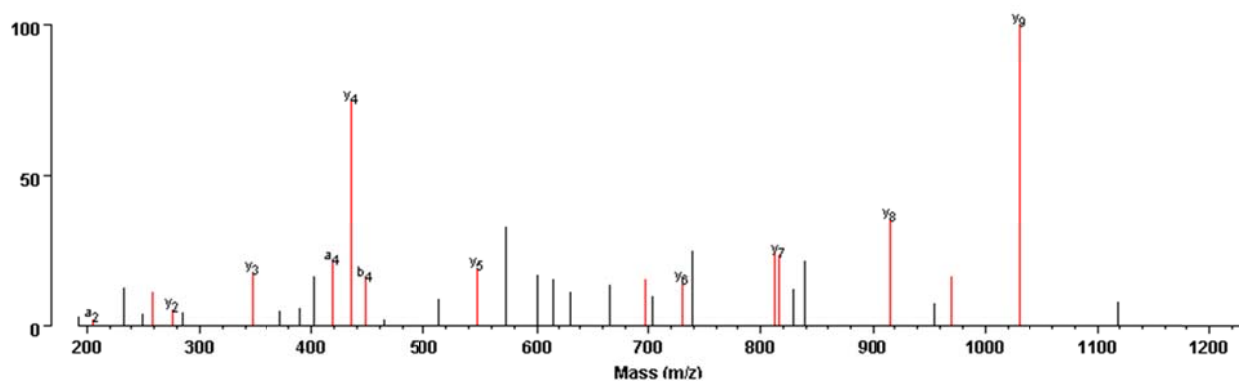

| m/z     | Ion Type                             | Error  |
|---------|--------------------------------------|--------|
| 205.271 | a <sub>2</sub> ,+1                   | 0.17   |
| 258.332 | y-H <sub>2</sub> O, <sub>2</sub> ,+1 | 0.19   |
| 276.412 | y <sub>2</sub> ,+1                   | 0.26   |
| 347.273 | y <sub>3</sub> ,+1                   | 0.08   |
| 419.01  | a <sub>4</sub> ,+1                   | -0.19  |
| 434.159 | y <sub>4</sub> ,+1                   | -0.066 |
| 447.117 | b <sub>4</sub> ,+1                   | -0.074 |
| 547.467 | y <sub>5</sub> ,+1                   | 0.16   |
| 697.834 | b-H <sub>2</sub> O, <sub>6</sub> ,+1 | -0.48  |
| 729.619 | y <sub>6</sub> ,+1                   | 0.2    |
| 812.711 | b-NH <sub>3</sub> , <sub>7</sub> ,+1 | 0.33   |
| 816.539 | y <sub>7</sub> ,+1                   | 0.093  |
| 915.555 | y <sub>8</sub> ,+1                   | 0.04   |
| 969.326 | b-H <sub>2</sub> O, <sub>9</sub> ,+1 | -0.14  |
| 1030.68 | y <sub>9</sub> ,+1                   | 0.14   |

| m/z      | z | P1 m/z  | P1 z | P1 peptide | P2 m/z  | P2 z | P2 peptide    |
|----------|---|---------|------|------------|---------|------|---------------|
| 676.3400 | 4 | 509.748 | 2    | VMQKDSEK   | 742.922 | 2    | LSAEKVEIATLTR |

### VMQK(XL:B-Alkene)DSEK<sup>+2</sup>

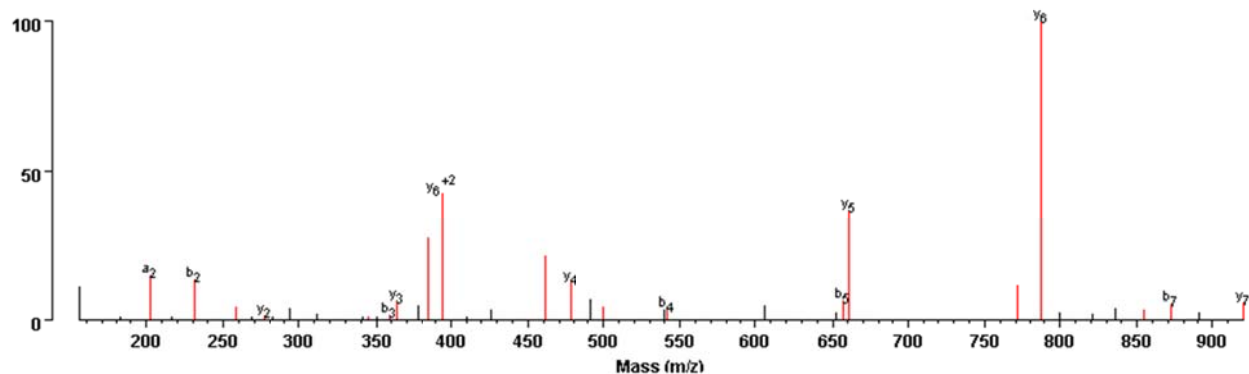

| m/z     | Ion Type                | Error  |
|---------|-------------------------|--------|
| 203.199 | a <sub>2</sub> ,+1      | 0.078  |
| 230.924 | y-NH <sub>3</sub> ,4,+2 | -0.17  |
|         | b <sub>2</sub> ,+1      | -0.19  |
|         | y-H <sub>2</sub> O,4,+2 | 0.32   |
| 258.182 | y-H <sub>2</sub> O,2,+1 | 0.037  |
| 276.18  | y <sub>2</sub> ,+1      | 0.025  |
| 345.313 | y-H <sub>2</sub> O,3,+1 | 0.14   |
| 358.795 | b <sub>3</sub> ,+1      | -0.38  |
| 363.033 | b-H <sub>2</sub> O,6,+2 | -0.13  |
|         | y <sub>3</sub> ,+1      | -0.15  |
| 385.892 | y-H <sub>2</sub> O,6,+2 | 0.2    |
|         | y-NH <sub>3</sub> ,6,+2 | -0.29  |
| 394.727 | y <sub>6</sub> ,+2      | 0.034  |
| 460.949 | y-NH <sub>3</sub> ,4,+1 | -0.24  |
| 478.229 | y <sub>4</sub> ,+1      | 0.015  |
| 500.143 | MH-H <sub>2</sub> O,,+2 | -0.6   |
| 541.51  | b <sub>4</sub> ,+1      | 0.23   |
| 656.593 | b <sub>5</sub> ,+1      | 0.29   |
| 660.29  | y <sub>5</sub> ,+1      | -0.03  |
| 771.443 | y-NH <sub>3</sub> ,6,+1 | 0.091  |
| 788.243 | y <sub>6</sub> ,+1      | -0.14  |
| 854.411 | b-H <sub>2</sub> O,7,+1 | 0.04   |
| 872.295 | b <sub>7</sub> ,+1      | -0.087 |
| 919.503 | y <sub>7</sub> ,+1      | 0.084  |

## LSAEK(XL:B-Alkene)VEIATLTR<sup>+2</sup>

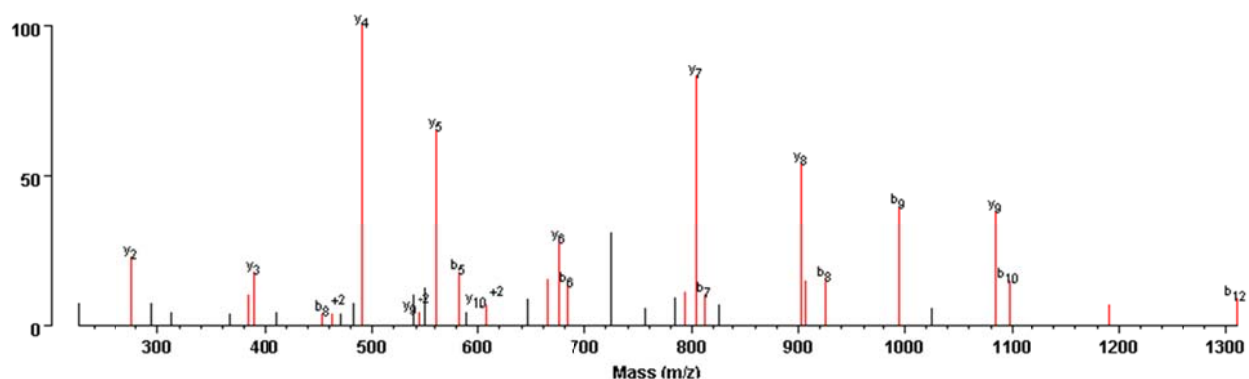

| m/z     | Ion Type                              | Error   |
|---------|---------------------------------------|---------|
| 276.235 | y <sub>2</sub> ,+1                    | 0.068   |
| 383.295 | b-H <sub>2</sub> O, <sub>4</sub> ,+1  | 0.1     |
| 389.584 | y <sub>3</sub> ,+1                    | 0.33    |
| 453.475 | b-H <sub>2</sub> O, <sub>8</sub> ,+2  | -0.28   |
| 462.87  | b, <sub>8</sub> ,+2                   | 0.11    |
| 490.259 | y <sub>4</sub> ,+1                    | -0.039  |
|         | b-NH <sub>3</sub> , <sub>9</sub> ,+2  | 0.5     |
| 542.95  | y <sub>9</sub> ,+2                    | 0.13    |
|         | y-H <sub>2</sub> O, <sub>5</sub> ,+1  | -0.37   |
| 561.344 | y <sub>5</sub> ,+1                    | 0.0085  |
| 583.221 | b, <sub>5</sub> ,+1                   | -0.088  |
| 607.535 | y <sub>10</sub> ,+2                   | 0.19    |
| 664.218 | b-H <sub>2</sub> O, <sub>6</sub> ,+1  | -0.15   |
| 674.322 | y <sub>6</sub> ,+1                    | -0.098  |
| 682.36  | b, <sub>6</sub> ,+1                   | -0.017  |
| 793.079 | b-H <sub>2</sub> O, <sub>7</sub> ,+1  | -0.33   |
| 803.344 | y <sub>7</sub> ,+1                    | -0.12   |
| 811.222 | b, <sub>7</sub> ,+1                   | -0.2    |
| 902.625 | y <sub>8</sub> ,+1                    | 0.094   |
| 906.118 | b-H <sub>2</sub> O, <sub>8</sub> ,+1  | -0.38   |
| 924.537 | b, <sub>8</sub> ,+1                   | 0.033   |
| 995.331 | b, <sub>9</sub> ,+1                   | -0.21   |
| 1084.63 | y <sub>9</sub> ,+1                    | -0.0061 |
| 1097.04 | b, <sub>10</sub> ,+1                  | 0.45    |
| 1191.3  | b-H <sub>2</sub> O, <sub>11</sub> ,+1 | -0.36   |
| 1310.26 | b, <sub>12</sub> ,+1                  | -0.46   |

| m/z      | z | P1 m/z  | P1 z | P1 peptide | P2 m/z  | P2 z | P2 peptide    |
|----------|---|---------|------|------------|---------|------|---------------|
| 615.3207 | 4 | 478.715 | 2    | NMSIKK     | 742.921 | 2    | LSAEKVEIATLTR |

### NMSIK(XL:B-Thiol(Unsaturated))K<sup>+2</sup>

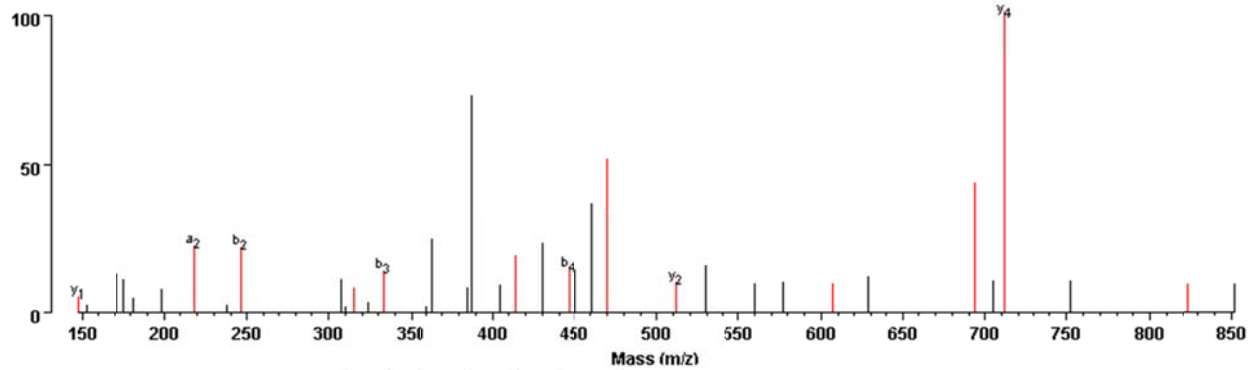

| m/z     | Ion Type   | Error  |
|---------|------------|--------|
| 147.271 | y,1,+1     | 0.16   |
| 218.24  | a,2,+1     | 0.14   |
| 246.006 | b,2,+1     | -0.085 |
| 314.971 | b-H2O,3,+1 | -0.14  |
| 333.053 | b,3,+1     | -0.07  |
| 413.7   | y-NH3,5,+2 | 0.52   |
| 446.178 | b,4,+1     | -0.029 |
| 469.921 | MH-H2O,,+2 | 0.21   |
|         | MH-NH3,,+2 | -0.28  |
| 511.382 | y,2,+1     | 0.16   |
| 607.039 | y-NH3,3,+1 | -0.24  |
| 693.286 | y-H2O,4,+1 | -0.045 |
| 711.414 | y,4,+1     | 0.072  |
| 824.078 | y-H2O,5,+1 | -0.29  |

## LSAEK(XL:B-Alkene)VEIATLTR<sup>+2</sup>



| m/z     | Ion Type    | Error   |
|---------|-------------|---------|
| 276.235 | y,2,+1      | 0.068   |
| 383.295 | b-H2O,4,+1  | 0.1     |
| 389.584 | y,3,+1      | 0.33    |
| 453.475 | b-H2O,8,+2  | -0.28   |
| 462.87  | b,8,+2      | 0.11    |
| 490.259 | y,4,+1      | -0.039  |
|         | b-NH3,9,+2  | 0.5     |
| 542.95  | y,9,+2      | 0.13    |
|         | y-H2O,5,+1  | -0.37   |
| 561.344 | y,5,+1      | 0.0085  |
| 583.221 | b,5,+1      | -0.088  |
| 607.535 | y,10,+2     | 0.19    |
| 664.218 | b-H2O,6,+1  | -0.15   |
| 674.322 | y,6,+1      | -0.098  |
| 682.36  | b,6,+1      | -0.017  |
| 793.079 | b-H2O,7,+1  | -0.33   |
| 803.344 | y,7,+1      | -0.12   |
| 811.222 | b,7,+1      | -0.2    |
| 902.625 | y,8,+1      | 0.094   |
| 906.118 | b-H2O,8,+1  | -0.38   |
| 924.537 | b,8,+1      | 0.033   |
| 995.331 | b,9,+1      | -0.21   |
| 1084.63 | y,9,+1      | -0.0061 |
| 1097.04 | b,10,+1     | 0.45    |
| 1191.3  | b-H2O,11,+1 | -0.36   |
| 1310.26 | b,12,+1     | -0.46   |

| m/z      | z | P1 m/z  | P1 z | P1 peptide | P2 m/z | P2 z | P2 peptide    |
|----------|---|---------|------|------------|--------|------|---------------|
| 820.0922 | 3 | 774.417 | 1    | NMSIKK     | 742.92 | 2    | LSAEKVEIATLTR |

### NMSIK(XL:B-Alkene)K

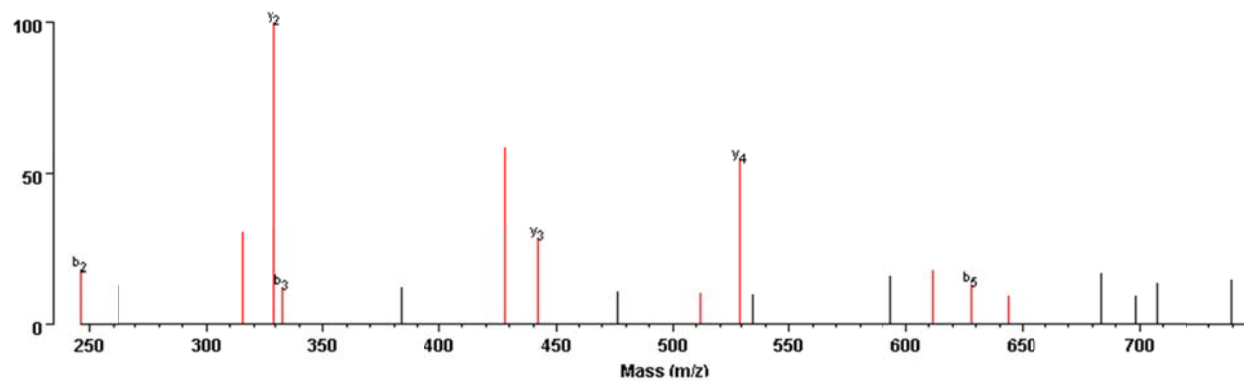

| m/z     | Ion Type                | Error  |
|---------|-------------------------|--------|
| 245.821 | b,2,+1                  | -0.27  |
| 315.06  | b-H <sub>2</sub> O,3,+1 | -0.052 |
| 329.258 | y,2,+1                  | 0.04   |
| 332.834 | b,3,+1                  | -0.29  |
| 427.991 | b-H <sub>2</sub> O,4,+1 | -0.21  |
| 442.135 | y,3,+1                  | -0.17  |
| 511.653 | y-H <sub>2</sub> O,4,+1 | 0.33   |
| 529.31  | y,4,+1                  | -0.024 |
| 611.367 | b-NH <sub>3</sub> ,5,+1 | 0.081  |
| 627.955 | b,5,+1                  | -0.36  |
| 643.547 | y-NH <sub>3</sub> ,5,+1 | 0.2    |

## LSAEK(XL:B-Alkene)VEIATLTR<sup>+2</sup>



| m/z     | Ion Type                              | Error   |
|---------|---------------------------------------|---------|
| 276.235 | y <sub>2</sub> ,+1                    | 0.068   |
| 383.295 | b-H <sub>2</sub> O, <sub>4</sub> ,+1  | 0.1     |
| 389.584 | y <sub>3</sub> ,+1                    | 0.33    |
| 453.475 | b-H <sub>2</sub> O, <sub>8</sub> ,+2  | -0.28   |
| 462.87  | b, <sub>8</sub> ,+2                   | 0.11    |
| 490.259 | y <sub>4</sub> ,+1                    | -0.039  |
|         | b-NH <sub>3</sub> , <sub>9</sub> ,+2  | 0.5     |
| 542.95  | y <sub>9</sub> ,+2                    | 0.13    |
|         | y-H <sub>2</sub> O, <sub>5</sub> ,+1  | -0.37   |
| 561.344 | y <sub>5</sub> ,+1                    | 0.0085  |
| 583.221 | b, <sub>5</sub> ,+1                   | -0.088  |
| 607.535 | y, <sub>10</sub> ,+2                  | 0.19    |
| 664.218 | b-H <sub>2</sub> O, <sub>6</sub> ,+1  | -0.15   |
| 674.322 | y, <sub>6</sub> ,+1                   | -0.098  |
| 682.36  | b, <sub>6</sub> ,+1                   | -0.017  |
| 793.079 | b-H <sub>2</sub> O, <sub>7</sub> ,+1  | -0.33   |
| 803.344 | y, <sub>7</sub> ,+1                   | -0.12   |
| 811.222 | b, <sub>7</sub> ,+1                   | -0.2    |
| 902.625 | y, <sub>8</sub> ,+1                   | 0.094   |
| 906.118 | b-H <sub>2</sub> O, <sub>8</sub> ,+1  | -0.38   |
| 924.537 | b, <sub>8</sub> ,+1                   | 0.033   |
| 995.331 | b, <sub>9</sub> ,+1                   | -0.21   |
| 1084.63 | y, <sub>9</sub> ,+1                   | -0.0061 |
| 1097.04 | b, <sub>10</sub> ,+1                  | 0.45    |
| 1191.3  | b-H <sub>2</sub> O, <sub>11</sub> ,+1 | -0.36   |
| 1310.26 | b, <sub>12</sub> ,+1                  | -0.46   |



| m/z      | z | P1 m/z  | P1 z | P1 peptide | P2 m/z  | P2 z | P2 peptide |
|----------|---|---------|------|------------|---------|------|------------|
| 582.7930 | 4 | 536.290 | 2    | ITITNDKGR  | 529.282 | 2    | LSKEEIER   |

### ITITNDK(XL:B-Alkene)GR<sup>+2</sup>

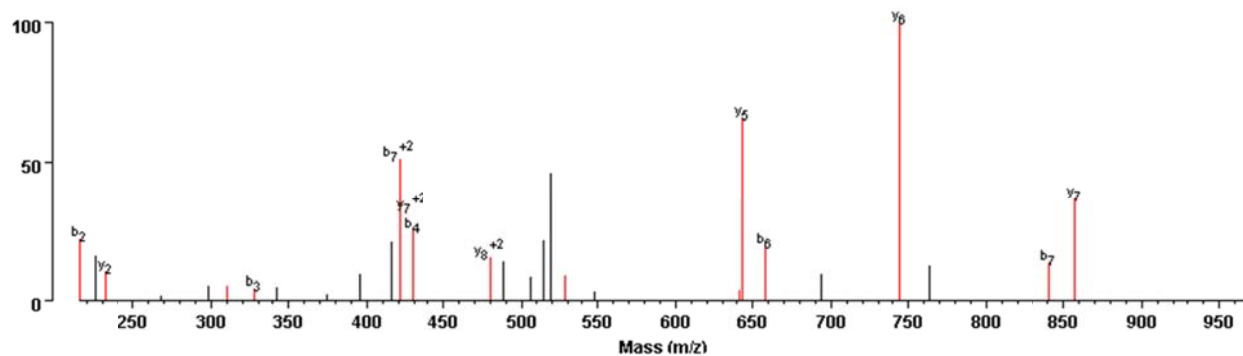

| m/z     | Ion Type                | Error  |
|---------|-------------------------|--------|
| 215.136 | b <sub>2</sub> ,+1      | -0.003 |
|         | y-NH <sub>3</sub> ,2,+1 | 0.022  |
| 232.29  | y <sub>2</sub> ,+1      | 0.15   |
| 309.997 | b-H <sub>2</sub> O,3,+1 | -0.22  |
| 327.918 | b <sub>3</sub> ,+1      | -0.31  |
| 420.989 | b <sub>7</sub> ,+2      | 0.26   |
|         | y-NH <sub>3</sub> ,7,+2 | 0.27   |
| 429.783 | b <sub>4</sub> ,+1      | 0.51   |
|         | y <sub>7</sub> ,+2      | 0.56   |
| 480.286 | y <sub>8</sub> ,+2      | 0.53   |
| 527.344 | MH-H <sub>2</sub> O,,+2 | 0.056  |
|         | MH-NH <sub>3</sub> ,,+2 | -0.44  |
| 641.316 | b-NH <sub>3</sub> ,6,+1 | 0.0019 |
| 643.464 | y <sub>5</sub> ,+1      | 0.15   |
| 657.823 | b <sub>6</sub> ,+1      | -0.52  |
| 744.449 | y <sub>6</sub> ,+1      | 0.086  |
| 840.767 | b <sub>7</sub> ,+1      | 0.32   |
|         | y-NH <sub>3</sub> ,7,+1 | 0.35   |
| 857.498 | y <sub>7</sub> ,+1      | 0.05   |

## LSK(XL:B-Alkene)EEIER<sup>+2</sup>

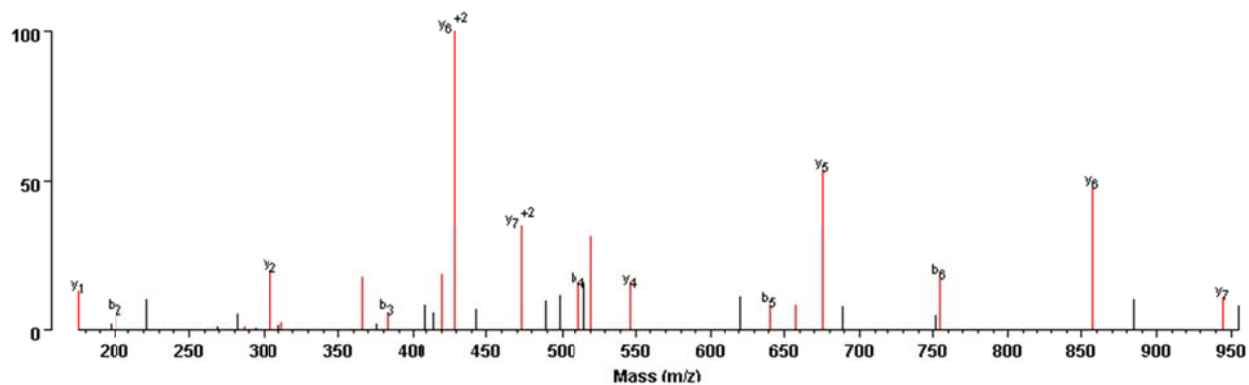

| m/z     | Ion Type   | Error  |
|---------|------------|--------|
| 175.178 | y,1,+1     | 0.059  |
| 200.943 | b,2,+1     | -0.18  |
|         | y-NH3,3,+2 | 0.33   |
| 286.268 | y-H2O,2,+1 | 0.12   |
| 304.281 | y,2,+1     | 0.12   |
| 312.46  | b-NH3,5,+2 | -0.19  |
|         | b-H2O,5,+2 | 0.3    |
| 365.384 | b-H2O,3,+1 | 0.17   |
| 383.045 | b,3,+1     | -0.18  |
| 419.987 | y-H2O,6,+2 | -0.23  |
| 429.308 | y,6,+2     | 0.086  |
| 472.691 | y,7,+2     | -0.047 |
| 511.733 | b,4,+1     | -0.54  |
| 520.295 | MH-H2O,,+2 | 0.02   |
|         | MH-NH3,,+2 | -0.47  |
| 546.307 | y,4,+1     | 0.019  |
| 641.097 | b,5,+1     | -0.22  |
| 657.545 | y-H2O,5,+1 | 0.22   |
| 675.345 | y,5,+1     | 0.014  |
| 754.194 | b,6,+1     | -0.2   |
| 857.508 | y,6,+1     | 0.072  |
| 944.918 | y,7,+1     | 0.45   |

| m/z      | z | P1 m/z  | P1 z | P1 peptide  | P2 m/z | P2 z | P2 peptide    |
|----------|---|---------|------|-------------|--------|------|---------------|
| 769.3677 | 4 | 696.824 | 2    | NYNKAVEEEDK | 741.91 | 2    | MTPEQLAIKNVGK |

### NYNK(XL:B-Alkene)AVEEEDK<sup>+2</sup>

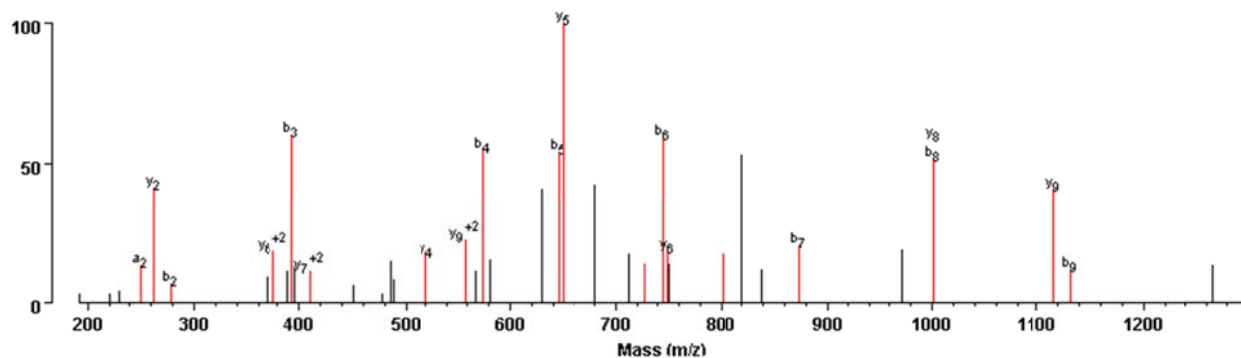

| m/z     | Ion Type                | Error  |
|---------|-------------------------|--------|
| 250.087 | a <sub>2</sub> ,+1      | -0.032 |
| 262.357 | y <sub>2</sub> ,+1      | 0.22   |
| 278.296 | b <sub>2</sub> ,+1      | 0.18   |
| 374.913 | b-NH <sub>3</sub> ,3,+1 | -0.22  |
|         | y <sub>6</sub> ,+2      | 0.24   |
| 392.427 | b <sub>3</sub> ,+1      | 0.27   |
| 410.136 | y <sub>7</sub> ,+2      | -0.054 |
| 520.454 | y <sub>4</sub> ,+1      | 0.23   |
| 558.638 | y <sub>9</sub> ,+2      | 0.37   |
| 574.14  | b <sub>4</sub> ,+1      | -0.12  |
| 645.21  | b <sub>5</sub> ,+1      | -0.089 |
| 649.333 | y <sub>5</sub> ,+1      | 0.065  |
| 727.205 | b-NH <sub>3</sub> ,6,+1 | -0.14  |
| 744.347 | b <sub>6</sub> ,+1      | -0.021 |
| 748.25  | y <sub>6</sub> ,+1      | -0.086 |
| 801.315 | y-H <sub>2</sub> O,7,+1 | -0.047 |
| 873.555 | b <sub>7</sub> ,+1      | 0.14   |
| 1001.98 | b <sub>8</sub> ,+1      | -0.47  |
|         | y <sub>8</sub> ,+1      | 0.5    |
| 1115.51 | y <sub>9</sub> ,+1      | -0.012 |
| 1132.06 | b <sub>9</sub> ,+1      | 0.56   |

# MTPEQLAIK(XL:B-Alkene)NVGK<sup>+2</sup>

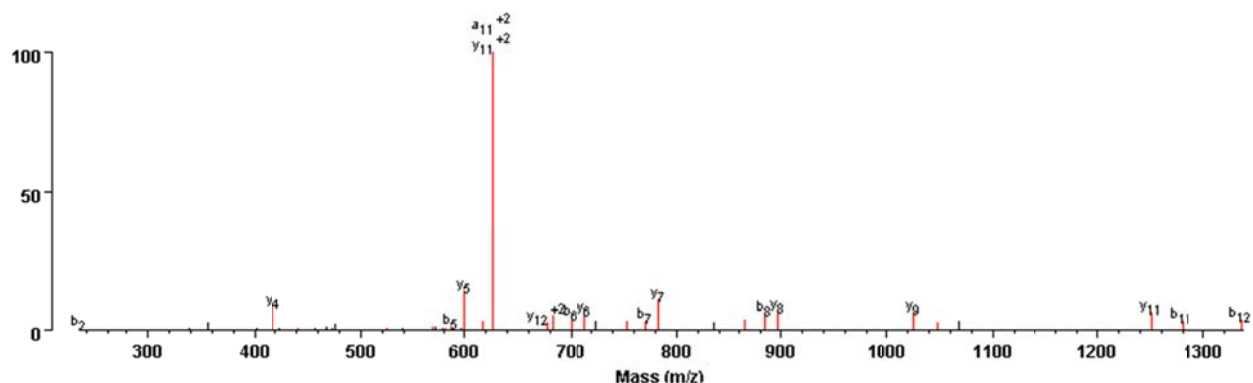

| m/z     | Ion Type                 | Error   |
|---------|--------------------------|---------|
| 233.163 | b,2,+1                   | 0.068   |
| 417.244 | y,4,+1                   | -0.0016 |
| 441.309 | b-H <sub>2</sub> O,4,+1  | 0.13    |
| 524.196 | b-H <sub>2</sub> O,9,+2  | -0.58   |
| 569.57  | b-H <sub>2</sub> O,5,+1  | 0.33    |
| 582.255 | b-NH <sub>3</sub> ,10,+2 | -0.037  |
|         | y-NH <sub>3</sub> ,5,+1  | -0.07   |
|         | b-H <sub>2</sub> O,10,+2 | 0.46    |
| 586.977 | b,5,+1                   | -0.27   |
| 599.365 | y,5,+1                   | 0.014   |
| 617.072 | y-H <sub>2</sub> O,11,+2 | 0.22    |
|         | y-NH <sub>3</sub> ,11,+2 | -0.27   |
| 626.1   | y,11,+2                  | 0.24    |
|         | a,11,+2                  | -0.24   |
| 676.439 | y,12,+2                  | 0.056   |
| 682.483 | b-H <sub>2</sub> O,6,+1  | 0.16    |
| 700.363 | b,6,+1                   | 0.03    |
| 712.645 | y,6,+1                   | 0.21    |
| 753.521 | b-H <sub>2</sub> O,7,+1  | 0.16    |
| 771.185 | b,7,+1                   | -0.19   |
| 783.526 | y,7,+1                   | 0.054   |
| 866.226 | b-H <sub>2</sub> O,8,+1  | -0.22   |
| 884.453 | b,8,+1                   | -0.0016 |
| 896.307 | y,8,+1                   | -0.25   |
| 1024.67 | y,9,+1                   | 0.055   |
| 1048    | b-H <sub>2</sub> O,9,+1  | -0.55   |
| 1250.38 | y,11,+1                  | -0.33   |
| 1279.71 | b,11,+1                  | 0.039   |
| 1336.61 | b,12,+1                  | -0.083  |

| m/z      | z | P1 m/z  | P1 z | P1 peptide  | P2 m/z | P2 z | P2 peptide |
|----------|---|---------|------|-------------|--------|------|------------|
| 633.5399 | 4 | 696.819 | 2    | NYNKAVEEEDK | 470.25 | 2    | NVGKQDPK   |

### NYNK(XL:B-Alkene)AVEEEDK<sup>+2</sup>

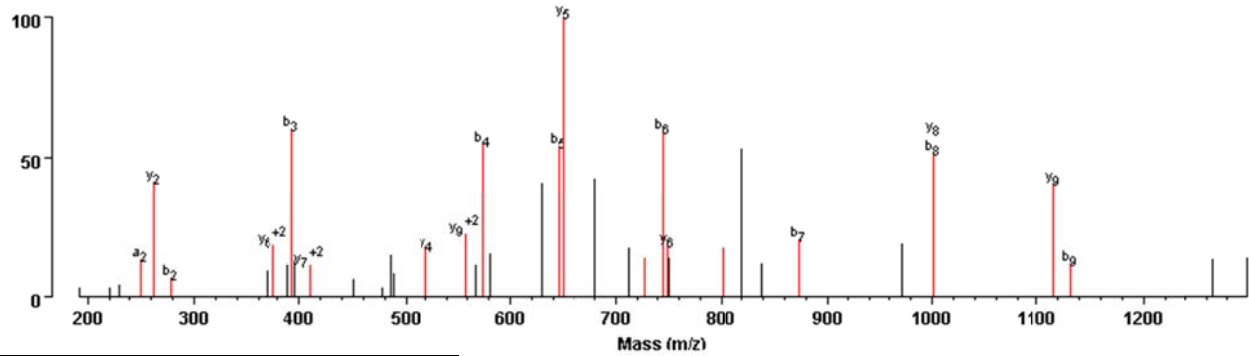

| m/z     | Ion Type                | Error  |
|---------|-------------------------|--------|
| 250.087 | a <sub>2</sub> ,+1      | -0.032 |
| 262.357 | y <sub>2</sub> ,+1      | 0.22   |
| 278.296 | b <sub>2</sub> ,+1      | 0.18   |
| 374.913 | b-NH <sub>3</sub> ,3,+1 | -0.22  |
|         | y <sub>6</sub> ,+2      | 0.24   |
| 392.427 | b <sub>3</sub> ,+1      | 0.27   |
| 410.136 | y <sub>7</sub> ,+2      | -0.054 |
| 520.454 | y <sub>4</sub> ,+1      | 0.23   |
| 558.638 | y <sub>9</sub> ,+2      | 0.37   |
| 574.14  | b <sub>4</sub> ,+1      | -0.12  |
| 645.21  | b <sub>5</sub> ,+1      | -0.089 |
| 649.333 | y <sub>5</sub> ,+1      | 0.065  |
| 727.205 | b-NH <sub>3</sub> ,6,+1 | -0.14  |
| 744.347 | b <sub>6</sub> ,+1      | -0.021 |
| 748.25  | y <sub>6</sub> ,+1      | -0.086 |
| 801.315 | y-H <sub>2</sub> O,7,+1 | -0.047 |
| 873.555 | b <sub>7</sub> ,+1      | 0.14   |
| 1001.98 | b <sub>8</sub> ,+1      | -0.47  |
|         | y <sub>8</sub> ,+1      | 0.5    |
| 1115.51 | y <sub>9</sub> ,+1      | -0.012 |
| 1132.06 | b <sub>9</sub> ,+1      | 0.56   |

# NVGK(XL:B-Alkene)QDPK<sup>+2</sup>

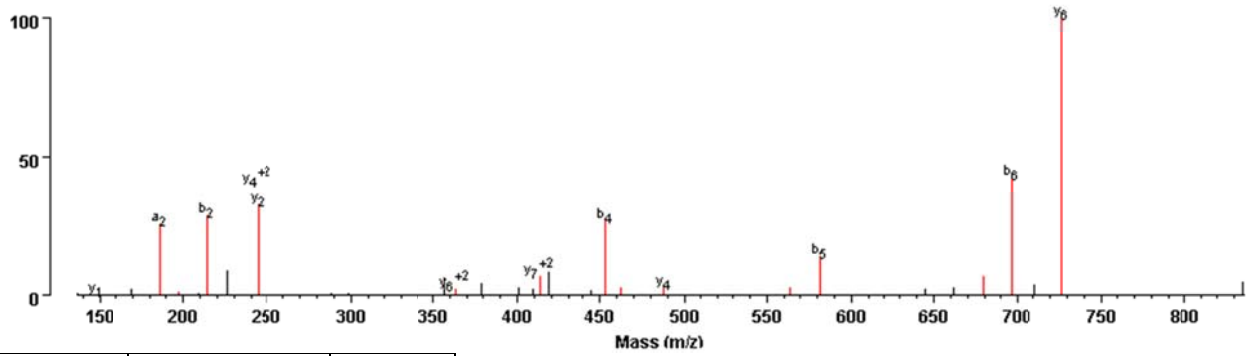

| m/z     | Ion Type   | Error  |
|---------|------------|--------|
| 146.987 | y,1,+1     | -0.13  |
| 186.227 | a,2,+1     | 0.1    |
| 197.307 | b-NH3,2,+1 | 0.21   |
| 214.181 | b,2,+1     | 0.062  |
| 244.326 | y,2,+1     | 0.16   |
|         | y,4,+2     | 0.2    |
| 363.664 | y,6,+2     | -0.029 |
| 413.512 | y,7,+2     | 0.29   |
| 452.891 | b,4,+1     | -0.35  |
| 461.996 | MH-NH3,,+2 | 0.26   |
| 487.489 | y,4,+1     | 0.24   |
| 564.155 | b-NH3,5,+1 | -0.12  |
| 581.355 | b,5,+1     | 0.051  |
| 679.224 | b-NH3,6,+1 | -0.081 |
| 696.23  | b,6,+1     | -0.1   |
| 726.457 | y,6,+1     | 0.079  |

| m/z      | z | P1 m/z  | P1 z | P1 peptide  | P2 m/z  | P2 z | P2 peptide |
|----------|---|---------|------|-------------|---------|------|------------|
| 614.2955 | 4 | 677.346 | 2    | VTHELQAMKDK | 451.235 | 2    | IKENSEK    |

### VTHELQAMK(XL:A-Alkene)DK<sup>+2</sup>

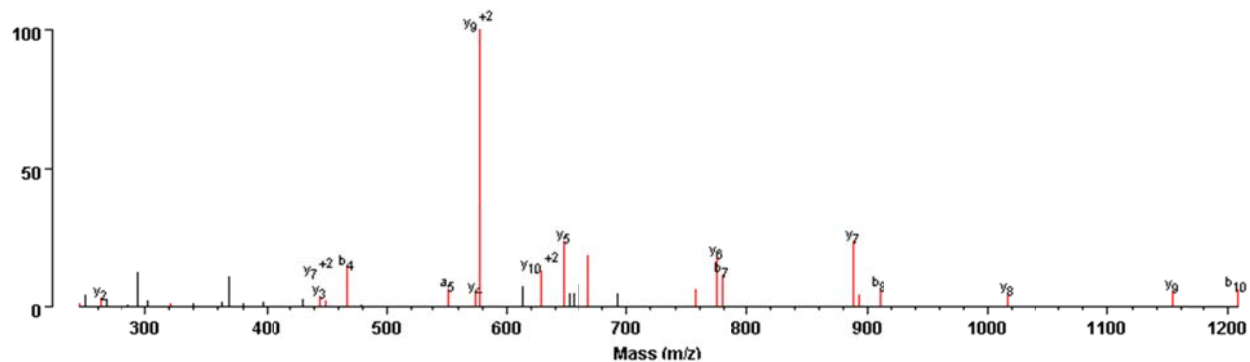

| m/z     | Ion Type                                         | Error  |
|---------|--------------------------------------------------|--------|
| 244.271 | y-H <sub>2</sub> O, <sub>2</sub> ,+ <sub>1</sub> | 0.14   |
| 262.16  | y, <sub>2</sub> ,+ <sub>1</sub>                  | 0.02   |
| 320.566 | b-H <sub>2</sub> O, <sub>3</sub> ,+ <sub>1</sub> | 0.39   |
| 444.583 | y, <sub>3</sub> ,+ <sub>1</sub>                  | 0.34   |
|         | y, <sub>7</sub> ,+ <sub>2</sub>                  | 0.35   |
| 449.237 | b-H <sub>2</sub> O, <sub>4</sub> ,+ <sub>1</sub> | 0.023  |
| 467.353 | b, <sub>4</sub> ,+ <sub>1</sub>                  | 0.13   |
| 552.274 | a, <sub>5</sub> ,+ <sub>1</sub>                  | -0.04  |
| 575.097 | y, <sub>4</sub> ,+ <sub>1</sub>                  | -0.19  |
| 577.511 | y, <sub>9</sub> ,+ <sub>2</sub>                  | 0.22   |
| 628.194 | y-H <sub>2</sub> O, <sub>5</sub> ,+ <sub>1</sub> | -0.12  |
|         | y, <sub>10</sub> ,+ <sub>2</sub>                 | 0.38   |
| 646.475 | y, <sub>5</sub> ,+ <sub>1</sub>                  | 0.15   |
| 668.534 | MH-H <sub>2</sub> O, <sub>,</sub> + <sub>2</sub> | 0.19   |
|         | MH-NH <sub>3</sub> , <sub>,</sub> + <sub>2</sub> | -0.3   |
| 757.194 | y-NH <sub>3</sub> , <sub>6</sub> ,+ <sub>1</sub> | -0.16  |
| 774.338 | y, <sub>6</sub> ,+ <sub>1</sub>                  | -0.043 |
| 779.658 | b, <sub>7</sub> ,+ <sub>1</sub>                  | 0.25   |
| 887.598 | y, <sub>7</sub> ,+ <sub>1</sub>                  | 0.13   |
| 892.491 | b-H <sub>2</sub> O, <sub>8</sub> ,+ <sub>1</sub> | 0.056  |
| 910.344 | b, <sub>8</sub> ,+ <sub>1</sub>                  | -0.1   |
| 1016.66 | y, <sub>8</sub> ,+ <sub>1</sub>                  | 0.15   |
| 1153.2  | y, <sub>9</sub> ,+ <sub>1</sub>                  | -0.37  |
| 1207.56 | b, <sub>10</sub> ,+ <sub>1</sub>                 | -0.018 |

# IK(XL:A-Alkene)ENSEK<sup>+2</sup>

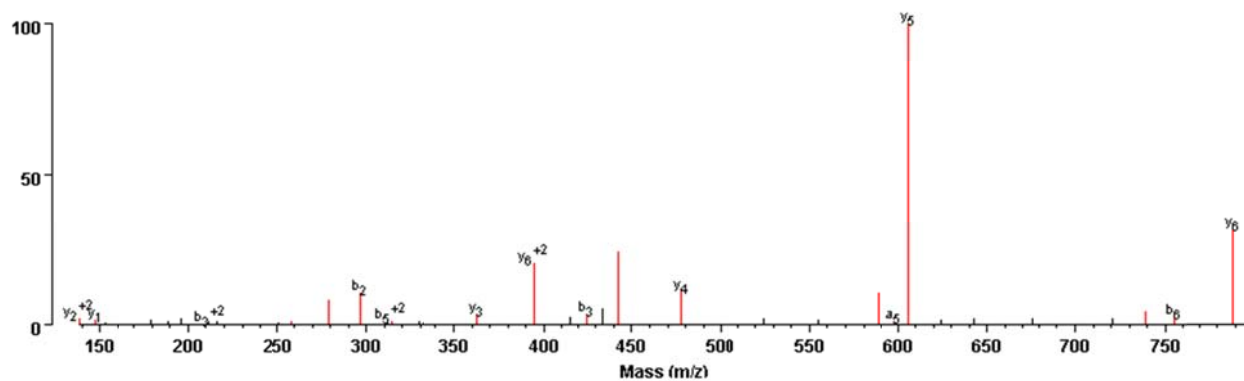

| m/z     | Ion Type                | Error  |
|---------|-------------------------|--------|
| 138.278 | y,2,+2                  | -0.3   |
| 147.292 | y,1,+1                  | 0.18   |
| 213.204 | b,3,+2                  | 0.081  |
| 258.384 | y-H <sub>2</sub> O,2,+1 | 0.24   |
| 279.197 | b-NH <sub>3</sub> ,2,+1 | 0.027  |
| 296.163 | b,2,+1                  | -0.034 |
| 314.227 | b,5,+2                  | 0.57   |
| 362.994 | y,3,+1                  | -0.19  |
| 394.889 | y,6,+2                  | 0.2    |
| 425.263 | b,3,+1                  | 0.024  |
| 442.077 | MH-H <sub>2</sub> O,,+2 | -0.15  |
| 477.373 | y,4,+1                  | 0.14   |
| 588.348 | y-H <sub>2</sub> O,5,+1 | 0.086  |
| 598.136 | a,5,+1                  | -0.18  |
| 606.186 | y,5,+1                  | -0.087 |
| 738.682 | b-NH <sub>3</sub> ,6,+1 | 0.35   |
| 755.389 | b,6,+1                  | 0.032  |
| 788.382 | y,6,+1                  | 0.0035 |



| m/z      | z | P1 m/z  | P1 z | P1 peptide | P2 m/z  | P2 z | P2 peptide |
|----------|---|---------|------|------------|---------|------|------------|
| 461.4756 | 4 | 499.276 | 2    | NELNAKVR   | 646.324 | 1    | AMDKK      |

### NELNAK(XL:B-Alkene)VR<sup>+2</sup>

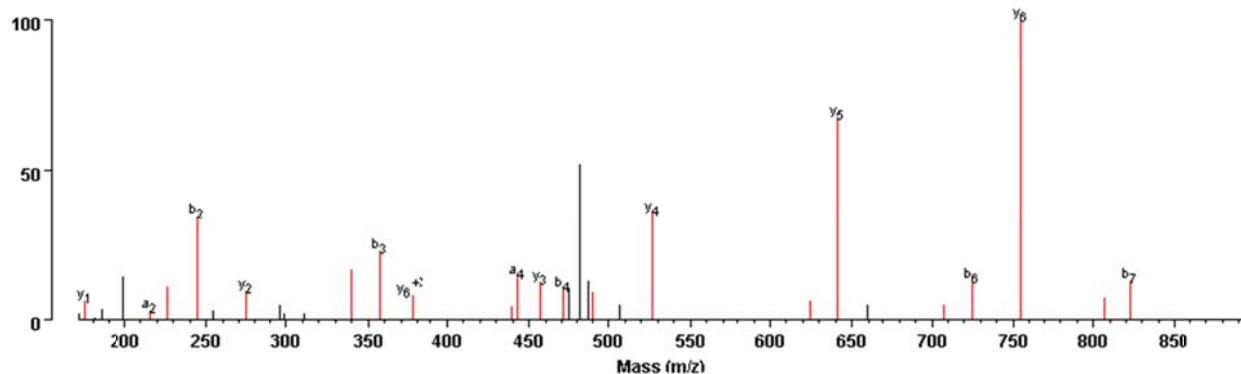

| m/z     | Ion Type                             | Error  |
|---------|--------------------------------------|--------|
| 175.159 | y <sub>1</sub> ,+1                   | 0.04   |
| 215.993 | a <sub>2</sub> ,+1                   | -0.1   |
| 226.208 | b-H <sub>2</sub> O, <sub>2</sub> ,+1 | 0.13   |
| 244.237 | b, <sub>2</sub> ,+1                  | 0.14   |
| 274.298 | y, <sub>2</sub> ,+1                  | 0.11   |
| 339.38  | b-H <sub>2</sub> O, <sub>3</sub> ,+1 | 0.21   |
| 357.189 | b, <sub>3</sub> ,+1                  | 0.012  |
| 377.592 | y, <sub>6</sub> ,+2                  | -0.14  |
| 439.203 | y-NH <sub>3</sub> , <sub>3</sub> ,+1 | -0.063 |
| 443.037 | a, <sub>4</sub> ,+1                  | -0.19  |
| 456.646 | y, <sub>3</sub> ,+1                  | 0.35   |
| 471.188 | b, <sub>4</sub> ,+1                  | -0.032 |
| 489.707 | MH-H <sub>2</sub> O,,+2              | -0.56  |
| 527.069 | y, <sub>4</sub> ,+1                  | -0.26  |
| 624.561 | y-NH <sub>3</sub> , <sub>5</sub> ,+1 | 0.21   |
| 641.359 | y, <sub>5</sub> ,+1                  | -0.014 |
| 707.548 | b-NH <sub>3</sub> , <sub>6</sub> ,+1 | 0.21   |
| 724.467 | b, <sub>6</sub> ,+1                  | 0.1    |
| 754.549 | y, <sub>6</sub> ,+1                  | 0.092  |
| 806.536 | b-NH <sub>3</sub> , <sub>7</sub> ,+1 | 0.13   |
| 822.914 | b, <sub>7</sub> ,+1                  | -0.52  |

### AMDK(XL:B-Alkene)K

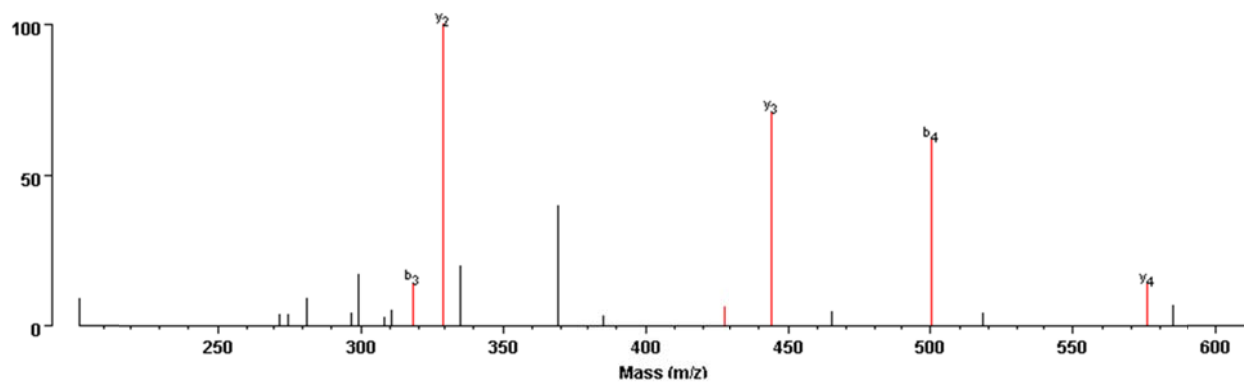

| m/z     | Ion Type                | Error  |
|---------|-------------------------|--------|
| 318.184 | b <sub>3</sub> ,+1      | 0.072  |
| 329.245 | y <sub>2</sub> ,+1      | 0.027  |
| 427.475 | γ-NH <sub>3</sub> ,3,+1 | 0.26   |
| 444.221 | y <sub>3</sub> ,+1      | -0.024 |
| 500.13  | b <sub>4</sub> ,+1      | -0.087 |
| 575.362 | y <sub>4</sub> ,+1      | 0.076  |

| m/z      | z | P1 m/z  | P1 z | P1 peptide | P2 m/z | P2 z | P2 peptide |
|----------|---|---------|------|------------|--------|------|------------|
| 495.9291 | 3 | 414.669 | 2    | AMDKK      | 640.44 | 1    | KVLVK      |

### AMDK(XL:B-Thiol(Unsaturated))K<sup>+2</sup>

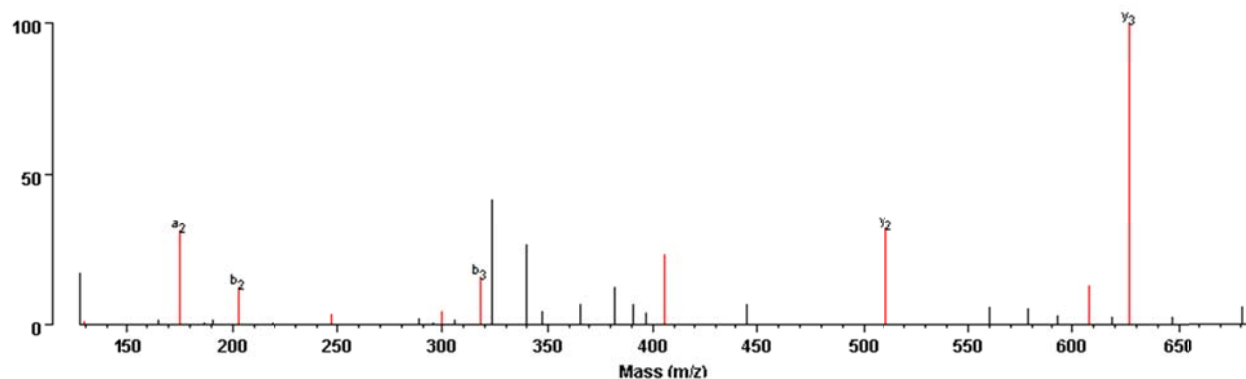

| m/z     | Ion Type           | Error  |
|---------|--------------------|--------|
| 129.68  | $\gamma$ -NH3,1,+1 | -0.41  |
| 175.19  | a,2,+1             | 0.1    |
| 202.908 | b,2,+1             | -0.18  |
| 247.344 | $\gamma$ -NH3,2,+2 | -0.26  |
| 299.886 | b-H2O,3,+1         | -0.22  |
| 318.085 | b,3,+1             | -0.027 |
| 405.733 | MH-H2O,,+2         | 0.07   |
|         | MH-NH3,,+2         | -0.42  |
| 511.232 | $\gamma$ ,2,+1     | 0.0065 |
| 607.869 | $\gamma$ -H2O,3,+1 | -0.37  |
| 626.361 | $\gamma$ ,3,+1     | 0.11   |

### K(XL:B-Alkene)VLVK

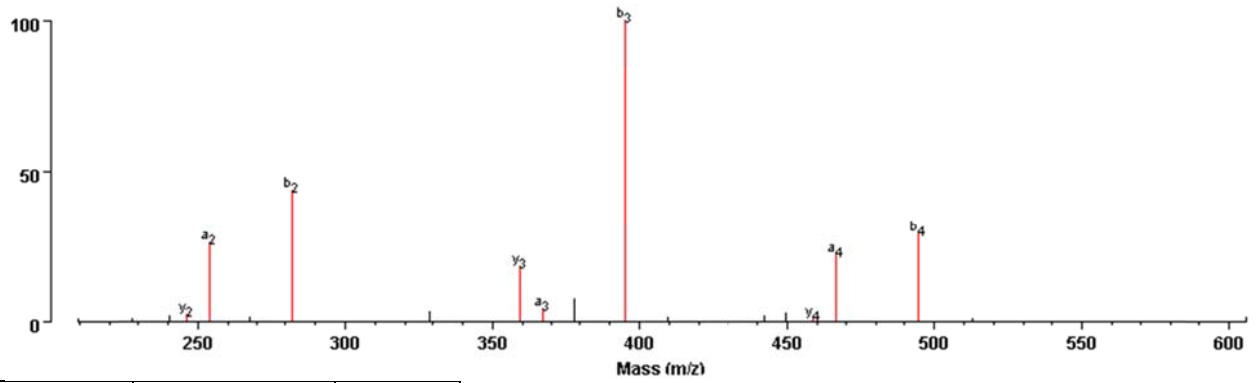

| m/z     | Ion Type          | Error  |
|---------|-------------------|--------|
| 246.368 | y <sub>2,+1</sub> | 0.19   |
| 254.231 | a <sub>2,+1</sub> | 0.045  |
| 282.249 | b <sub>2,+1</sub> | 0.068  |
| 359.197 | y <sub>3,+1</sub> | -0.068 |
| 367.133 | a <sub>3,+1</sub> | -0.14  |
| 395.182 | b <sub>3,+1</sub> | -0.083 |
| 458.802 | y <sub>4,+1</sub> | 0.47   |
| 466.241 | a <sub>4,+1</sub> | -0.098 |
| 494.46  | b <sub>4,+1</sub> | 0.13   |

| m/z      | z | P1 m/z  | P1 z | P1 peptide | P2 m/z | P2 z | P2 peptide    |
|----------|---|---------|------|------------|--------|------|---------------|
| 591.3166 | 4 | 640.440 | 1    | KVLVK      | 761.9  | 2    | VHPEGKFVVDVDK |

### K(XL:B-Alkene)VLVK

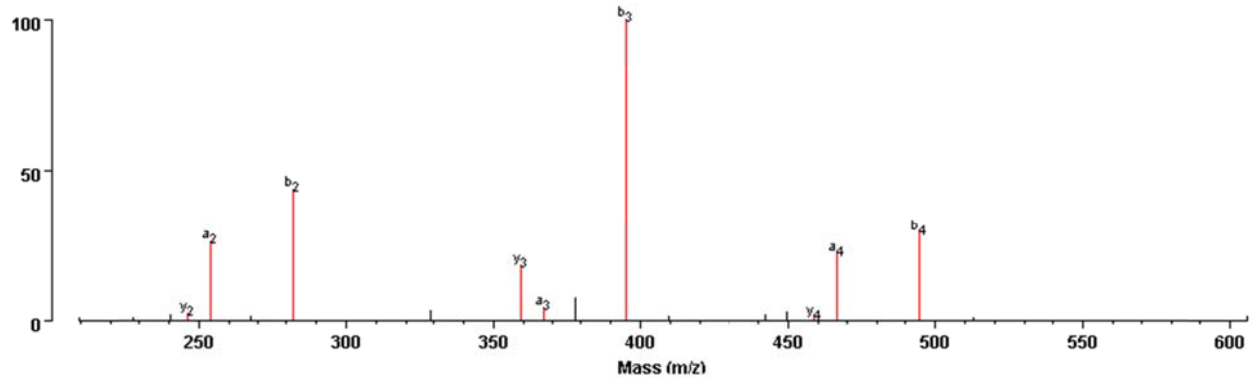

| m/z     | Ion Type           | Error  |
|---------|--------------------|--------|
| 246.368 | y <sub>2</sub> ,+1 | 0.19   |
| 254.231 | a <sub>2</sub> ,+1 | 0.045  |
| 282.249 | b <sub>2</sub> ,+1 | 0.068  |
| 359.197 | y <sub>3</sub> ,+1 | -0.068 |
| 367.133 | a <sub>3</sub> ,+1 | -0.14  |
| 395.182 | b <sub>3</sub> ,+1 | -0.083 |
| 458.802 | y <sub>4</sub> ,+1 | 0.47   |
| 466.241 | a <sub>4</sub> ,+1 | -0.098 |
| 494.46  | b <sub>4</sub> ,+1 | 0.13   |

# VHPEGK(XL:A-Alkene)FVVDVDK<sup>+2</sup>

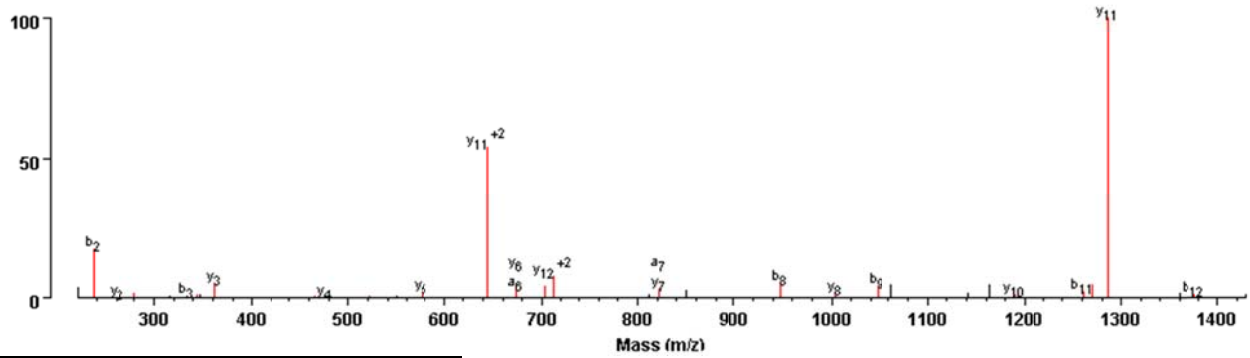

| m/z     | Ion Type    | Error   |
|---------|-------------|---------|
| 237.271 | b,2,+1      | 0.14    |
| 262.084 | y,2,+1      | -0.056  |
| 279.243 | y-H2O,5,+2  | 0.093   |
|         | y-NH3,5,+2  | -0.4    |
| 334.417 | b,3,+1      | 0.23    |
| 344.207 | y-NH3,3,+1  | 0.025   |
| 361.204 | y,3,+1      | -0.0042 |
| 466.33  | b-NH3,8,+2  | 0.093   |
|         | b-H2O,8,+2  | 0.58    |
| 476.268 | y,4,+1      | 0.033   |
| 521.686 | y-H2O,9,+2  | -0.096  |
|         | y-NH3,9,+2  | -0.59   |
| 575.267 | y,5,+1      | -0.037  |
| 644.109 | y,11,+2     | 0.27    |
| 674.241 | a,6,+1      | -0.12   |
|         | y,6,+1      | -0.13   |
| 703.245 | y-H2O,12,+2 | -0.11   |
| 712.309 | y,12,+2     | -0.055  |
| 821.474 | y,7,+1      | 0.034   |
|         | a,7,+1      | 0.044   |
| 948.291 | b,8,+1      | -0.2    |
| 1003.44 | y,8,+1      | -0.11   |
| 1047.4  | b,9,+1      | -0.16   |
| 1189.91 | y,10,+1     | 0.3     |
| 1261.64 | b,11,+1     | -0.018  |
| 1269.75 | y-NH3,11,+1 | 0.11    |
| 1286.54 | y,11,+1     | -0.12   |
| 1376.62 | b,12,+1     | -0.064  |

| m/z      | z | P1 m/z  | P1 z | P1 peptide | P2 m/z  | P2 z | P2 peptide       |
|----------|---|---------|------|------------|---------|------|------------------|
| 773.1585 | 4 | 580.346 | 2    | VLVKVHPEGK | 865.958 | 2    | VSGSELVQKFIGEGAR |

### VLVK(XL:B-Alkene)VHPEGK<sup>+2</sup>

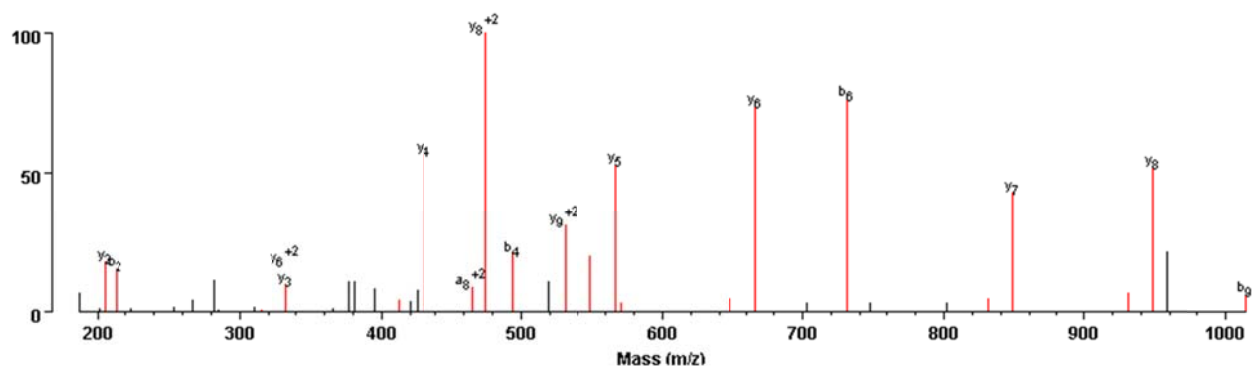

| m/z     | Ion Type                                       | Error  |
|---------|------------------------------------------------|--------|
| 204.293 | y <sub>2</sub> <sup>+1</sup>                   | 0.16   |
| 213.069 | b <sub>2</sub> <sup>+1</sup>                   | -0.091 |
| 315.48  | y-H <sub>2</sub> O <sub>3</sub> <sup>+1</sup>  | 0.31   |
| 333.19  | y <sub>3</sub> <sup>+1</sup>                   | 0.013  |
|         | y <sub>6</sub> <sup>+2</sup>                   | -0.49  |
| 412.474 | y-H <sub>2</sub> O <sub>4</sub> <sup>+1</sup>  | 0.25   |
| 430.356 | y <sub>4</sub> <sup>+1</sup>                   | 0.13   |
| 465.38  | y-H <sub>2</sub> O <sub>8</sub> <sup>+2</sup>  | 0.12   |
|         | y-NH <sub>3</sub> <sub>8</sub> <sup>+2</sup>   | -0.38  |
|         | a <sub>8</sub> <sup>+2</sup>                   | 0.6    |
| 474.441 | y <sub>8</sub> <sup>+2</sup>                   | 0.17   |
| 494.28  | b <sub>4</sub> <sup>+1</sup>                   | -0.054 |
| 530.708 | y <sub>9</sub> <sup>+2</sup>                   | -0.1   |
| 549.027 | y-H <sub>2</sub> O <sub>5</sub> <sup>+1</sup>  | -0.25  |
| 567.403 | y <sub>5</sub> <sup>+1</sup>                   | 0.11   |
| 571.233 | MH-H <sub>2</sub> O <sub>8</sub> <sup>+2</sup> | -0.11  |
|         | MH-NH <sub>3</sub> <sub>8</sub> <sup>+2</sup>  | -0.6   |
| 648.404 | y-H <sub>2</sub> O <sub>6</sub> <sup>+1</sup>  | 0.058  |
| 666.217 | y <sub>6</sub> <sup>+1</sup>                   | -0.14  |
| 730.517 | b <sub>6</sub> <sup>+1</sup>                   | 0.056  |
| 831.506 | y-NH <sub>3</sub> <sub>7</sub> <sup>+1</sup>   | 0.07   |
| 848.535 | y <sub>7</sub> <sup>+1</sup>                   | 0.073  |
| 930.654 | y-NH <sub>3</sub> <sub>8</sub> <sup>+1</sup>   | 0.15   |
| 947.607 | y <sub>8</sub> <sup>+1</sup>                   | 0.076  |
| 1013.52 | b <sub>9</sub> <sup>+1</sup>                   | -0.058 |

## VSGSELVQK(XL:B-Alkene)FIGEGAR<sup>+2</sup>



| m/z     | Ion Type    | Error   |
|---------|-------------|---------|
| 303.257 | y,3,+1      | 0.079   |
|         | a,4,+1      | 0.091   |
| 415.533 | y-NH3,4,+1  | 0.34    |
| 432.079 | a,5,+1      | -0.13   |
|         | y,4,+1      | -0.14   |
| 442.27  | b-H2O,5,+1  | 0.077   |
| 471.055 | y-H2O,5,+1  | -0.18   |
| 489.358 | y,5,+1      | 0.12    |
| 555.207 | b-H2O,6,+1  | -0.07   |
| 573.181 | b,6,+1      | -0.11   |
| 602.361 | y,6,+1      | 0.035   |
| 654.367 | b-H2O,7,+1  | 0.021   |
| 672.195 | b,7,+1      | -0.16   |
| 749.617 | y,7,+1      | 0.22    |
| 800.325 | b,8,+1      | -0.09   |
| 931.392 | y,8,+1      | -0.11   |
| 954.177 | a,9,+1      | -0.35   |
| 982.417 | b,9,+1      | -0.1    |
| 1041.48 | y-H2O,9,+1  | -0.068  |
| 1059.48 | y,9,+1      | -0.078  |
| 1129.69 | b,10,+1     | 0.1     |
| 1158.68 | y,10,+1     | 0.053   |
| 1224.3  | b-H2O,11,+1 | -0.36   |
| 1242.46 | b,11,+1     | -0.21   |
| 1299.72 | b,12,+1     | 0.026   |
| 1428.73 | b,13,+1     | -0.0069 |
| 1556.49 | b,15,+1     | -0.31   |



| m/z      | z | P1 m/z  | P1 z | P1 peptide      | P2 m/z  | P2 z | P2 peptide              |
|----------|---|---------|------|-----------------|---------|------|-------------------------|
| 863.9333 | 4 | 761.901 | 2    | VHPEGK FVVDV DK | 956.957 | 2    | VSGSELVQK F I G E G A R |

### VHPEGK(XL:A-Alkene)FVVDV DK<sup>+2</sup>

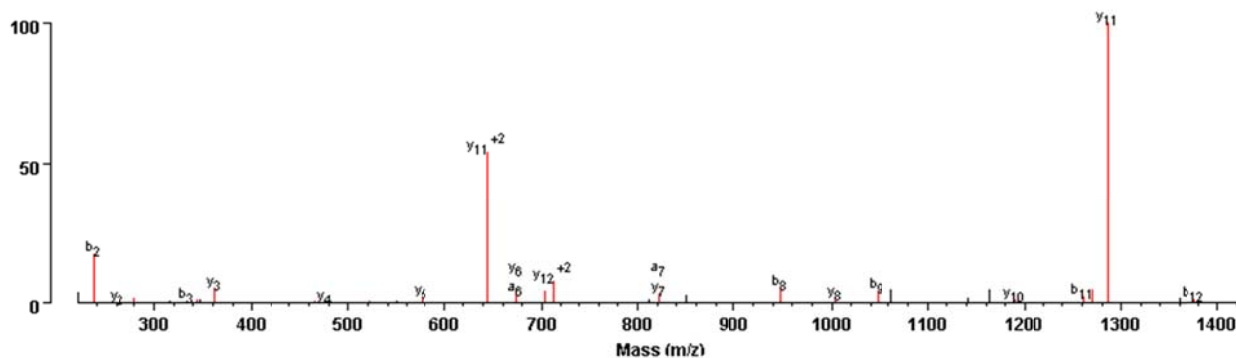

| m/z     | Ion Type                              | Error   |
|---------|---------------------------------------|---------|
| 237.271 | b <sub>2</sub> ,+1                    | 0.14    |
| 262.084 | y <sub>2</sub> ,+1                    | -0.056  |
| 279.243 | y-H <sub>2</sub> O, <sub>5</sub> ,+2  | 0.093   |
|         | y-NH <sub>3</sub> , <sub>5</sub> ,+2  | -0.4    |
| 334.417 | b <sub>3</sub> ,+1                    | 0.23    |
| 344.207 | y-NH <sub>3</sub> , <sub>3</sub> ,+1  | 0.025   |
| 361.204 | y <sub>3</sub> ,+1                    | -0.0042 |
| 466.33  | b-NH <sub>3</sub> , <sub>8</sub> ,+2  | 0.093   |
|         | b-H <sub>2</sub> O, <sub>8</sub> ,+2  | 0.58    |
| 476.268 | y <sub>4</sub> ,+1                    | 0.033   |
| 521.686 | y-H <sub>2</sub> O, <sub>9</sub> ,+2  | -0.096  |
|         | y-NH <sub>3</sub> , <sub>9</sub> ,+2  | -0.59   |
| 575.267 | y <sub>5</sub> ,+1                    | -0.037  |
| 644.109 | y <sub>11</sub> ,+2                   | 0.27    |
| 674.241 | a <sub>6</sub> ,+1                    | -0.12   |
|         | y <sub>6</sub> ,+1                    | -0.13   |
| 703.245 | y-H <sub>2</sub> O, <sub>12</sub> ,+2 | -0.11   |
| 712.309 | y <sub>12</sub> ,+2                   | -0.055  |
| 821.474 | y <sub>7</sub> ,+1                    | 0.034   |
|         | a <sub>7</sub> ,+1                    | 0.044   |
| 948.291 | b <sub>8</sub> ,+1                    | -0.2    |
| 1003.44 | y <sub>8</sub> ,+1                    | -0.11   |
| 1047.4  | b <sub>9</sub> ,+1                    | -0.16   |
| 1189.91 | y <sub>10</sub> ,+1                   | 0.3     |
| 1261.64 | b <sub>11</sub> ,+1                   | -0.018  |
| 1269.75 | y-NH <sub>3</sub> , <sub>11</sub> ,+1 | 0.11    |

|         |         |        |
|---------|---------|--------|
| 1286.54 | y,11,+1 | -0.12  |
| 1376.62 | b,12,+1 | -0.064 |

### VSGSELVQK(XL:B-Thiol(Unsaturated))FIGEGAR<sup>+2</sup>

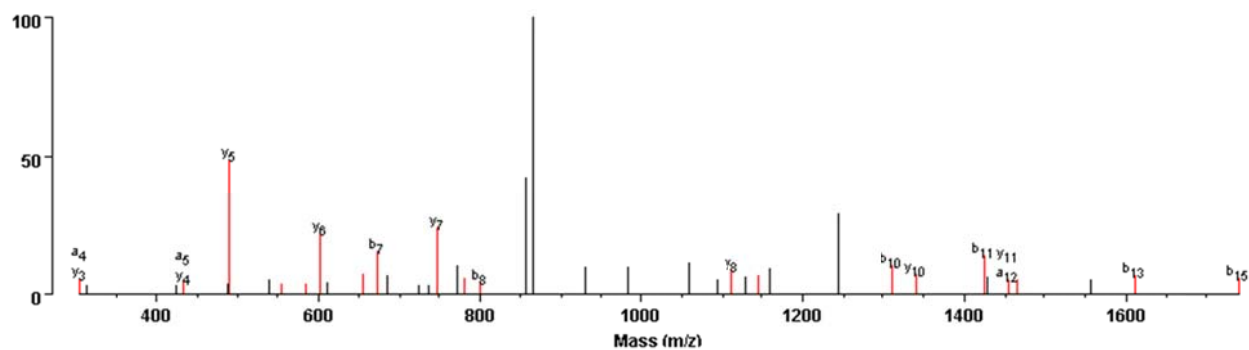

| m/z     | Ion Type    | Error    |
|---------|-------------|----------|
| 303.296 | y,3,+1      | 0.12     |
|         | a,4,+1      | 0.13     |
| 432.271 | y,4,+1      | 0.051    |
|         | a,5,+1      | 0.062    |
| 489.417 | y,5,+1      | 0.18     |
| 555.443 | b-H2O,6,+1  | 0.17     |
| 584.427 | y-H2O,6,+1  | 0.11     |
| 602.326 | y,6,+1      | 3.50E-04 |
| 654.581 | b-H2O,7,+1  | 0.24     |
| 672.288 | b,7,+1      | -0.068   |
| 749.401 | y,7,+1      | 0.0069   |
| 782.263 | b-H2O,8,+1  | -0.14    |
| 800.195 | b,8,+1      | -0.22    |
| 1113.44 | y,8,+1      | -0.067   |
| 1146.37 | b-H2O,9,+1  | -0.15    |
| 1311.62 | b,10,+1     | 0.024    |
| 1340.82 | y,10,+1     | 0.19     |
| 1424.32 | b,11,+1     | -0.36    |
| 1453.66 | a,12,+1     | -0.047   |
|         | y,11,+1     | -0.058   |
| 1464.06 | b-H2O,12,+1 | 0.37     |
| 1611.02 | b,13,+1     | 0.28     |
| 1739.24 | b,15,+1     | 0.44     |

| m/z      | z | P1 m/z  | P1 z | P1 peptide | P2 m/z  | P2 z | P2 peptide |
|----------|---|---------|------|------------|---------|------|------------|
| 541.7886 | 4 | 574.843 | 2    | LDILKIHSR  | 408.724 | 2    | KMNLTR     |

### LDILK(XL:B-Alkene)IHSR<sup>+2</sup>

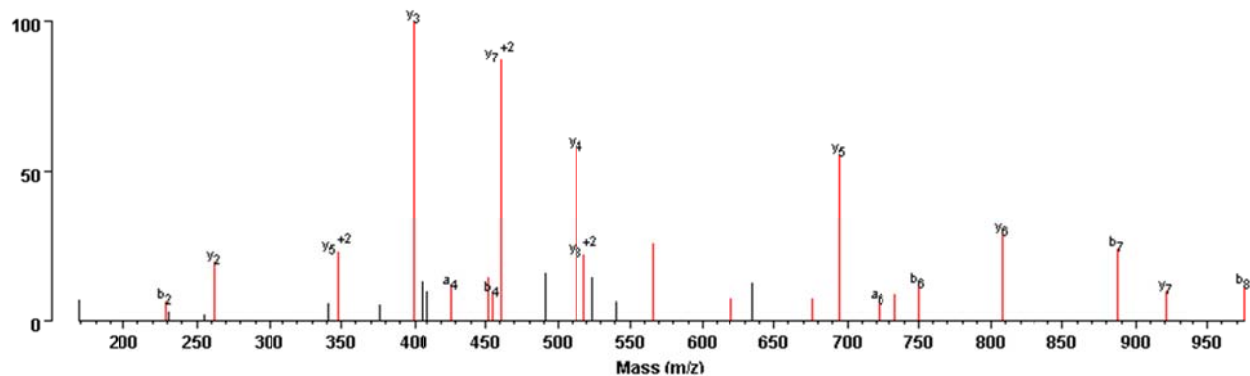

| m/z     | Ion Type                | Error  |
|---------|-------------------------|--------|
| 228.984 | b <sub>2</sub> ,+1      | -0.13  |
| 262.172 | y <sub>2</sub> ,+1      | 0.021  |
| 347.721 | y <sub>5</sub> ,+2      | 0.018  |
| 399.345 | y <sub>3</sub> ,+1      | 0.14   |
| 426.999 | a <sub>4</sub> ,+1      | -0.29  |
| 452.057 | y-NH <sub>3</sub> ,7,+2 | -0.22  |
|         | y-H <sub>2</sub> O,7,+2 | 0.27   |
| 455.252 | b <sub>4</sub> ,+1      | -0.034 |
| 460.853 | y <sub>7</sub> ,+2      | 0.066  |
| 512.429 | y <sub>4</sub> ,+1      | 0.14   |
| 518.27  | y <sub>8</sub> ,+2      | -0.031 |
| 565.916 | MH-H <sub>2</sub> O,,+2 | 0.078  |
|         | MH-NH <sub>3</sub> ,,+2 | -0.41  |
| 620.234 | b-NH <sub>3</sub> ,5,+1 | -0.13  |
| 676.234 | y-H <sub>2</sub> O,5,+1 | -0.15  |
| 694.378 | y <sub>5</sub> ,+1      | -0.021 |
| 722.086 | a <sub>6</sub> ,+1      | -0.4   |
| 733.315 | b-NH <sub>3</sub> ,6,+1 | -0.13  |
| 750.299 | b <sub>6</sub> ,+1      | -0.18  |
| 807.44  | y <sub>6</sub> ,+1      | -0.044 |
| 887.596 | b <sub>7</sub> ,+1      | 0.061  |
| 920.913 | y <sub>7</sub> ,+1      | 0.35   |
| 974.697 | b <sub>8</sub> ,+1      | 0.13   |

## K(XL:B-Alkene)MNLTR<sup>+2</sup>

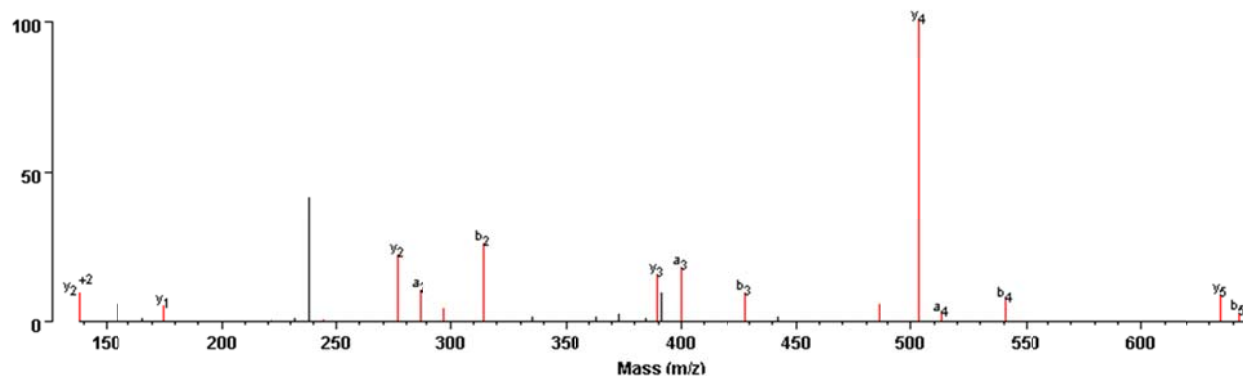

| m/z     | Ion Type                | Error  |
|---------|-------------------------|--------|
| 138.091 | y <sub>2</sub> ,+2      | -0.5   |
| 175.06  | y <sub>1</sub> ,+1      | -0.059 |
| 244.185 | γ-NH <sub>3</sub> ,4,+2 | 0.55   |
| 276.302 | y <sub>2</sub> ,+1      | 0.14   |
| 286.06  | a <sub>2</sub> ,+1      | -0.098 |
| 297.246 | b-NH <sub>3</sub> ,2,+1 | 0.12   |
| 314.138 | b <sub>2</sub> ,+1      | -0.015 |
| 389.42  | y <sub>3</sub> ,+1      | 0.17   |
| 400.08  | a <sub>3</sub> ,+1      | -0.12  |
|         | MH-NH <sub>3</sub> ,,+2 | -0.13  |
|         | MH-H <sub>2</sub> O,,+2 | 0.36   |
| 428.259 | b <sub>3</sub> ,+1      | 0.063  |
| 485.995 | γ-NH <sub>3</sub> ,4,+1 | -0.27  |
| 503.326 | y <sub>4</sub> ,+1      | 0.032  |
| 513.457 | a <sub>4</sub> ,+1      | 0.17   |
| 541.023 | b <sub>4</sub> ,+1      | -0.26  |
| 634.719 | y <sub>5</sub> ,+1      | 0.38   |
| 642.507 | b <sub>5</sub> ,+1      | 0.18   |

| m/z      | z | P1 m/z  | P1 z | P1 peptide | P2 m/z  | P2 z | P2 peptide |
|----------|---|---------|------|------------|---------|------|------------|
| 664.6444 | 3 | 509.748 | 2    | VMQKDSEK   | 774.419 | 1    | NMSIKK     |

### VMQK(XL:B-Alkene)DSEK<sup>+2</sup>



| m/z     | Ion Type                | Error  |
|---------|-------------------------|--------|
| 203.199 | a <sub>2</sub> ,+1      | 0.078  |
| 230.924 | y-NH <sub>3</sub> ,4,+2 | -0.17  |
|         | b <sub>2</sub> ,+1      | -0.19  |
|         | y-H <sub>2</sub> O,4,+2 | 0.32   |
| 258.182 | y-H <sub>2</sub> O,2,+1 | 0.037  |
| 276.18  | y <sub>2</sub> ,+1      | 0.025  |
| 345.313 | y-H <sub>2</sub> O,3,+1 | 0.14   |
| 358.795 | b <sub>3</sub> ,+1      | -0.38  |
| 363.033 | b-H <sub>2</sub> O,6,+2 | -0.13  |
|         | y <sub>3</sub> ,+1      | -0.15  |
| 385.892 | y-H <sub>2</sub> O,6,+2 | 0.2    |
|         | y-NH <sub>3</sub> ,6,+2 | -0.29  |
| 394.727 | y <sub>6</sub> ,+2      | 0.034  |
| 460.949 | y-NH <sub>3</sub> ,4,+1 | -0.24  |
| 478.229 | y <sub>4</sub> ,+1      | 0.015  |
| 500.143 | MH-H <sub>2</sub> O,,+2 | -0.6   |
| 541.51  | b <sub>4</sub> ,+1      | 0.23   |
| 656.593 | b <sub>5</sub> ,+1      | 0.29   |
| 660.29  | y <sub>5</sub> ,+1      | -0.03  |
| 771.443 | y-NH <sub>3</sub> ,6,+1 | 0.091  |
| 788.243 | y <sub>6</sub> ,+1      | -0.14  |
| 854.411 | b-H <sub>2</sub> O,7,+1 | 0.04   |
| 872.295 | b <sub>7</sub> ,+1      | -0.087 |
| 919.503 | y <sub>7</sub> ,+1      | 0.084  |

# NMSIK(XL:B-Alkene)K

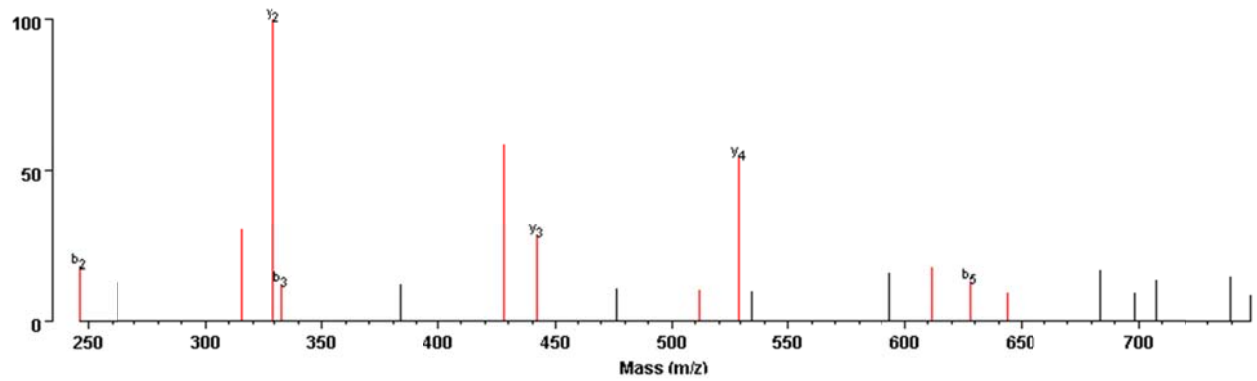

| m/z     | Ion Type                             | Error  |
|---------|--------------------------------------|--------|
| 245.821 | b <sub>2</sub> ,+1                   | -0.27  |
| 315.06  | b-H <sub>2</sub> O, <sub>3</sub> ,+1 | -0.052 |
| 329.258 | y <sub>2</sub> ,+1                   | 0.04   |
| 332.834 | b <sub>3</sub> ,+1                   | -0.29  |
| 427.991 | b-H <sub>2</sub> O, <sub>4</sub> ,+1 | -0.21  |
| 442.135 | y <sub>3</sub> ,+1                   | -0.17  |
| 511.653 | y-H <sub>2</sub> O, <sub>4</sub> ,+1 | 0.33   |
| 529.31  | y <sub>4</sub> ,+1                   | -0.024 |
| 611.367 | b-NH <sub>3</sub> , <sub>5</sub> ,+1 | 0.081  |
| 627.955 | b <sub>5</sub> ,+1                   | -0.36  |
| 643.547 | y-NH <sub>3</sub> , <sub>5</sub> ,+1 | 0.2    |

| m/z      | z | P1 m/z  | P1 z | P1 peptide | P2 m/z  | P2 z | P2 peptide |
|----------|---|---------|------|------------|---------|------|------------|
| 601.7863 | 4 | 527.246 | 2    | KHEEEEAQ   | 576.323 | 2    | QKEVEQLIK  |

### K(XL:B-Alkene)HEEEEAQ<sup>+2</sup>

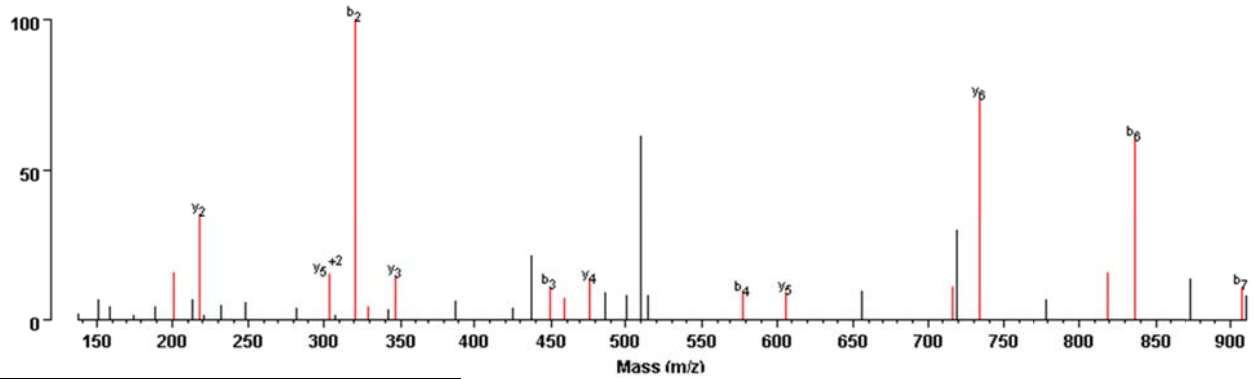

| m/z     | Ion Type                | Error  |
|---------|-------------------------|--------|
| 201.21  | y-NH <sub>3</sub> ,2,+1 | 0.087  |
| 218.316 | y <sub>2</sub> ,+1      | 0.17   |
| 303.281 | b-NH <sub>3</sub> ,2,+1 | 0.14   |
|         | y <sub>5</sub> ,+2      | 0.14   |
| 320.175 | b <sub>2</sub> ,+1      | 0.0033 |
| 329.162 | y-H <sub>2</sub> O,3,+1 | -0.02  |
| 347.007 | y <sub>3</sub> ,+1      | -0.19  |
| 449.345 | b <sub>3</sub> ,+1      | 0.13   |
| 458.488 | y-H <sub>2</sub> O,4,+1 | 0.26   |
| 476.288 | y <sub>4</sub> ,+1      | 0.053  |
| 578.202 | b <sub>4</sub> ,+1      | -0.055 |
| 605.874 | y <sub>5</sub> ,+1      | 0.6    |
| 716.064 | y-H <sub>2</sub> O,6,+1 | -0.25  |
| 734.116 | y <sub>6</sub> ,+1      | -0.2   |
| 818.542 | b-H <sub>2</sub> O,6,+1 | 0.21   |
| 836.447 | b <sub>6</sub> ,+1      | 0.1    |
| 907.25  | b <sub>7</sub> ,+1      | -0.13  |

### Q(Gln->pyro-Glu)K(XL:B-Alkene)EVEQLIK<sup>+2</sup>

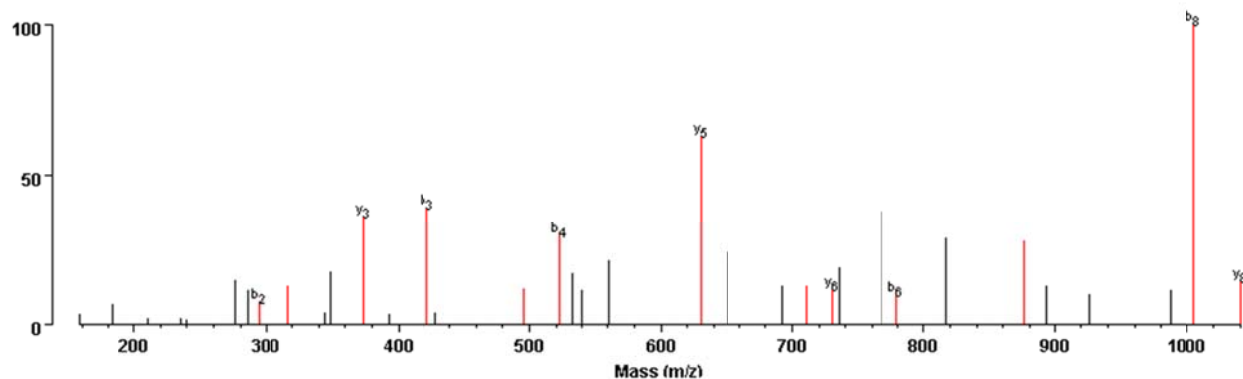

| m/z     | Ion Type                             | Error   |
|---------|--------------------------------------|---------|
| 294.097 | b <sub>2</sub> ,+1                   | -0.048  |
| 317.282 | b-H <sub>2</sub> O, <sub>5</sub> ,+2 | 0.13    |
|         | b-NH <sub>3</sub> , <sub>5</sub> ,+2 | -0.36   |
| 373.274 | y <sub>3</sub> ,+1                   | -0.0069 |
| 423.119 | b <sub>3</sub> ,+1                   | -0.068  |
| 495.086 | b-NH <sub>3</sub> , <sub>8</sub> ,+2 | 0.33    |
| 522.396 | b <sub>4</sub> ,+1                   | 0.14    |
| 630.359 | y <sub>5</sub> ,+1                   | -0.023  |
| 711.01  | y-H <sub>2</sub> O, <sub>6</sub> ,+1 | -0.43   |
| 729.639 | y <sub>6</sub> ,+1                   | 0.19    |
| 779.333 | b <sub>6</sub> ,+1                   | -0.024  |
| 875.272 | b-NH <sub>3</sub> , <sub>7</sub> ,+1 | -0.14   |
| 1005.43 | b <sub>8</sub> ,+1                   | -0.095  |
| 1040    | y <sub>8</sub> ,+1                   | -0.6    |



| m/z      | z | P1 m/z  | P1 z | P1 peptide     | P2 m/z  | P2 z | P2 peptide |
|----------|---|---------|------|----------------|---------|------|------------|
| 678.1033 | 4 | 742.878 | 2    | FAAKGEGQLGPAER | 513.315 | 2    | LIEKLDIK   |

### FAAK(XL:B-Alkene)GEGQLGPAER<sup>+2</sup>

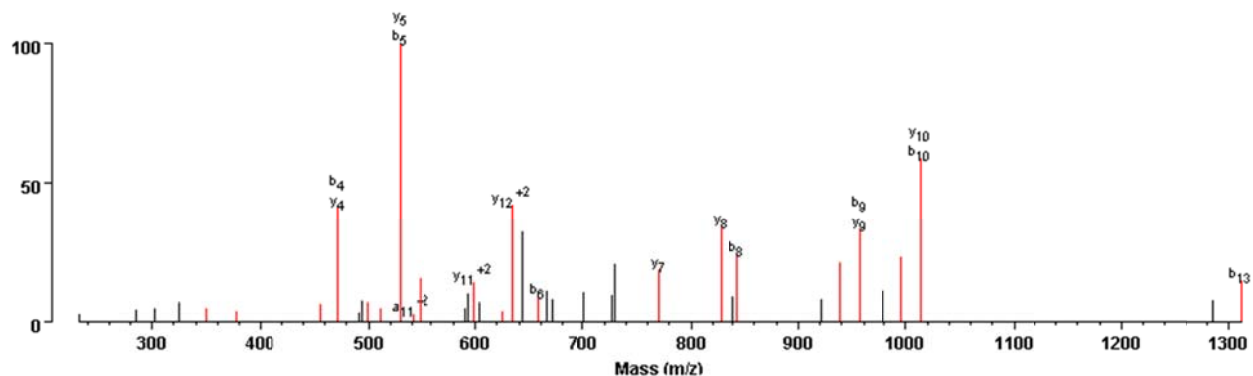

| m/z     | Ion Type    | Error  |
|---------|-------------|--------|
| 349.512 | b-NH3,7,+2  | -0.15  |
|         | b-H2O,7,+2  | 0.34   |
| 377.326 | y-NH3,7,+2  | 0.13   |
| 455.3   | b-NH3,4,+1  | 0.071  |
|         | y-NH3,4,+1  | 0.075  |
| 472.237 | y,4,+1      | -0.014 |
|         | b,4,+1      | -0.018 |
| 498.819 | b-NH3,10,+2 | 0.076  |
|         | y-NH3,10,+2 | 0.078  |
|         | b-H2O,10,+2 | 0.57   |
|         | y-H2O,10,+2 | 0.57   |
| 511.351 | y-H2O,5,+1  | 0.089  |
| 529.388 | b,5,+1      | 0.11   |
|         | y,5,+1      | 0.12   |
| 541.366 | a,11,+2     | -0.42  |
| 547.432 | b-NH3,11,+2 | 0.16   |
| 598.662 | y,11,+2     | 0.36   |
| 625.262 | y-NH3,12,+2 | -0.05  |
|         | y-NH3,6,+1  | -0.068 |
|         | y-H2O,12,+2 | 0.44   |
| 634.143 | y,12,+2     | 0.32   |
| 658.286 | b,6,+1      | -0.034 |
| 770.496 | y,7,+1      | 0.08   |
| 827.615 | y,8,+1      | 0.18   |
| 843.55  | b,8,+1      | 0.15   |
| 938.393 | y-H2O,9,+1  | -0.076 |

|         |             |        |
|---------|-------------|--------|
|         | b-H2O,9,+1  | -0.08  |
| 956.387 | y,9,+1      | -0.093 |
|         | b,9,+1      | -0.097 |
| 996.126 | y-NH3,10,+1 | -0.35  |
|         | b-NH3,10,+1 | -0.35  |
| 1013.64 | b,10,+1     | 0.13   |
|         | y,10,+1     | 0.14   |
| 1310.79 | b,13,+1     | 0.15   |

### LIEK(XL:B-Alkene)LDIK<sup>+2</sup>

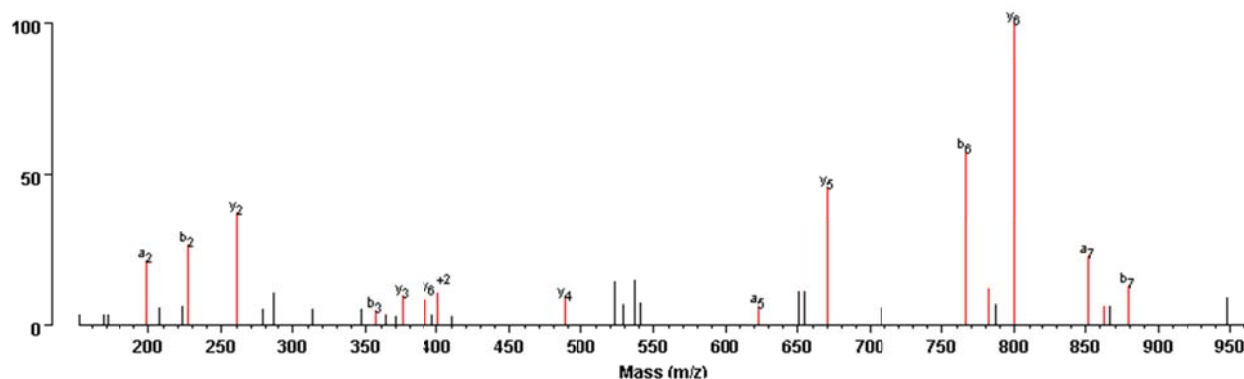

| m/z     | Ion Type   | Error  |
|---------|------------|--------|
| 198.954 | a,2,+1     | -0.23  |
| 227.03  | b,2,+1     | -0.15  |
| 260.26  | y,2,+1     | 0.063  |
|         | b-H2O,4,+2 | -0.4   |
| 356.202 | b,3,+1     | -0.016 |
| 375.278 | y,3,+1     | 0.054  |
|         | b-NH3,6,+2 | 0.07   |
|         | b-H2O,6,+2 | 0.56   |
| 391.332 | y-H2O,6,+2 | 0.11   |
|         | y-NH3,6,+2 | -0.39  |
| 400.622 | y,6,+2     | 0.39   |
| 487.86  | y,4,+1     | -0.45  |
| 622.942 | a,5,+1     | -0.47  |
| 670.709 | y,5,+1     | 0.3    |
| 766.441 | b,6,+1     | 0.0065 |
| 782.433 | y-NH3,6,+1 | 0.0036 |
| 799.487 | y,6,+1     | 0.031  |
| 851.426 | a,7,+1     | -0.098 |
| 862.711 | b-NH3,7,+1 | 0.22   |
| 879.36  | b,7,+1     | -0.16  |

| m/z      | z | P1 m/z  | P1 z | P1 peptide | P2 m/z  | P2 z | P2 peptide |
|----------|---|---------|------|------------|---------|------|------------|
| 491.2270 | 4 | 558.724 | 2    | KVEDMMK    | 414.723 | 2    | KLWGDR     |

### K(XL:B-Thiol(Unsaturated))VEDMMK<sup>+2</sup>

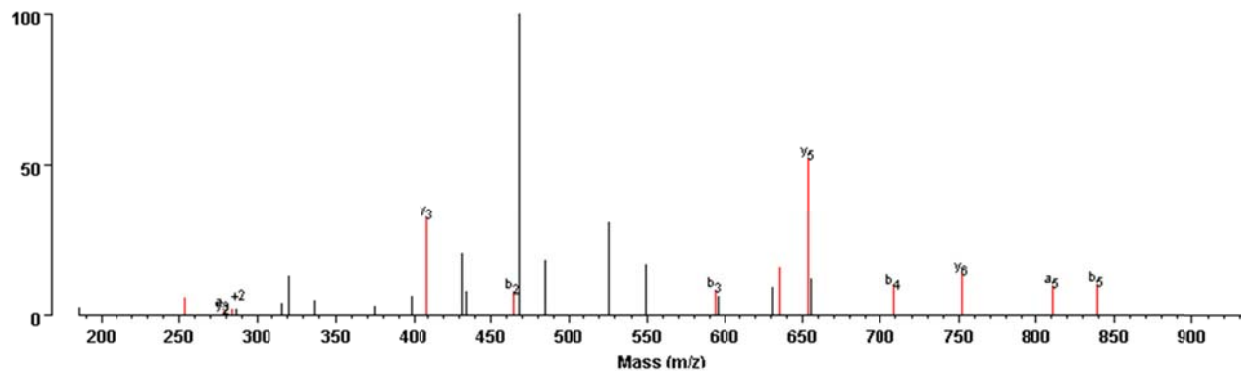

| m/z     | Ion Type   | Error |
|---------|------------|-------|
| 253.972 | y-NH3,4,+2 | -0.13 |
|         | y-H2O,4,+2 | 0.36  |
| 278.277 | y,2,+1     | 0.12  |
| 283.341 | a,3,+2     | 0.22  |
| 409.405 | y,3,+1     | 0.21  |
| 464.42  | b,2,+1     | 0.23  |
| 593.347 | b,3,+1     | 0.12  |
| 635.284 | y-H2O,5,+1 | 0.031 |
| 653.308 | y,5,+1     | 0.045 |
| 708.303 | b,4,+1     | 0.045 |
| 752.388 | y,6,+1     | 0.056 |
| 811.112 | a,5,+1     | -0.19 |
| 839.185 | b,5,+1     | -0.11 |

# K(XL:B-Alkene)LWGDR<sup>+2</sup>

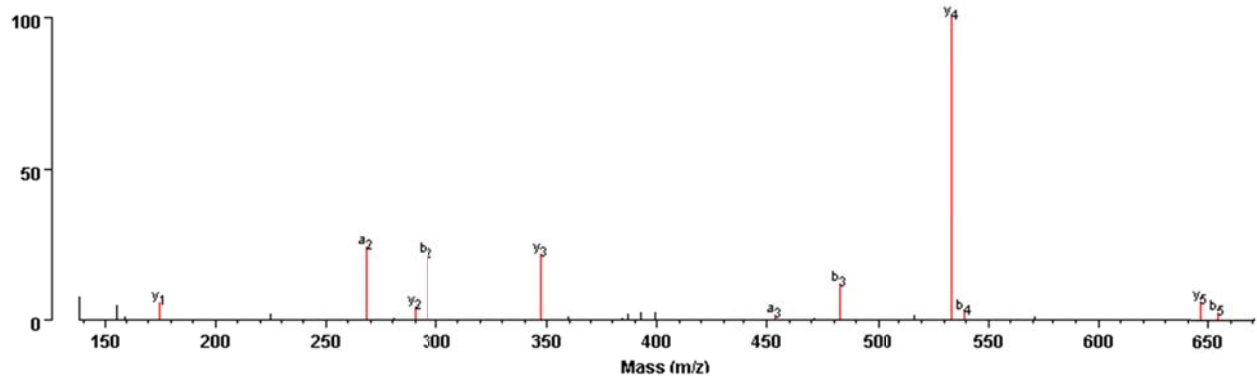

| m/z     | Ion Type | Error  |
|---------|----------|--------|
| 175.037 | y,1,+1   | -0.082 |
| 268.085 | a,2,+1   | -0.12  |
| 290.269 | y,2,+1   | 0.12   |
| 295.847 | b,2,+1   | -0.35  |
| 347.191 | y,3,+1   | 0.024  |
| 454.122 | a,3,+1   | -0.16  |
| 482.729 | b,3,+1   | 0.45   |
| 533.305 | y,4,+1   | 0.058  |
| 539.523 | b,4,+1   | 0.23   |
| 646.365 | y,5,+1   | 0.034  |
| 654.285 | b,5,+1   | -0.04  |

| m/z      | z | P1 m/z  | P1 z | P1 peptide | P2 m/z  | P2 z | P2 peptide |
|----------|---|---------|------|------------|---------|------|------------|
| 582.7930 | 4 | 536.290 | 2    | ITITNDKGR  | 529.282 | 2    | LSKEEIER   |

### ITITNDK(XL:B-Alkene)GR<sup>+2</sup>



| m/z     | Ion Type   | Error  |
|---------|------------|--------|
| 215.136 | b,2,+1     | -0.003 |
|         | y-NH3,2,+1 | 0.022  |
| 232.29  | y,2,+1     | 0.15   |
| 309.997 | b-H2O,3,+1 | -0.22  |
| 327.918 | b,3,+1     | -0.31  |
| 420.989 | b,7,+2     | 0.26   |
|         | y-NH3,7,+2 | 0.27   |
| 429.783 | b,4,+1     | 0.51   |
|         | y,7,+2     | 0.56   |
| 480.286 | y,8,+2     | 0.53   |
| 527.344 | MH-H2O,,+2 | 0.056  |
|         | MH-NH3,,+2 | -0.44  |
| 641.316 | b-NH3,6,+1 | 0.0019 |
| 643.464 | y,5,+1     | 0.15   |
| 657.823 | b,6,+1     | -0.52  |
| 744.449 | y,6,+1     | 0.086  |
| 840.767 | b,7,+1     | 0.32   |
|         | y-NH3,7,+1 | 0.35   |
| 857.498 | y,7,+1     | 0.05   |

## LSK(XL:B-Alkene)EEIER<sup>+2</sup>



| m/z     | Ion Type   | Error  |
|---------|------------|--------|
| 175.178 | y,1,+1     | 0.059  |
| 200.943 | b,2,+1     | -0.18  |
|         | y-NH3,3,+2 | 0.33   |
| 286.268 | y-H2O,2,+1 | 0.12   |
| 304.281 | y,2,+1     | 0.12   |
| 312.46  | b-NH3,5,+2 | -0.19  |
|         | b-H2O,5,+2 | 0.3    |
| 365.384 | b-H2O,3,+1 | 0.17   |
| 383.045 | b,3,+1     | -0.18  |
| 419.987 | y-H2O,6,+2 | -0.23  |
| 429.308 | y,6,+2     | 0.086  |
| 472.691 | y,7,+2     | -0.047 |
| 511.733 | b,4,+1     | -0.54  |
| 520.295 | MH-H2O,,+2 | 0.02   |
|         | MH-NH3,,+2 | -0.47  |
| 546.307 | y,4,+1     | 0.019  |
| 641.097 | b,5,+1     | -0.22  |
| 657.545 | y-H2O,5,+1 | 0.22   |
| 675.345 | y,5,+1     | 0.014  |
| 754.194 | b,6,+1     | -0.2   |
| 857.508 | y,6,+1     | 0.072  |
| 944.918 | y,7,+1     | 0.45   |

| m/z      | z | P1 m/z  | P1 z | P1 peptide | P2 m/z  | P2 z | P2 peptide   |
|----------|---|---------|------|------------|---------|------|--------------|
| 531.6768 | 5 | 459.763 | 2    | QHSLLR     | 512.611 | 3    | KEAPPMKPEVVK |

**Q(Gln->pyro-Glu)HSLRK(XL:B-Alkene)R<sup>+2</sup>**

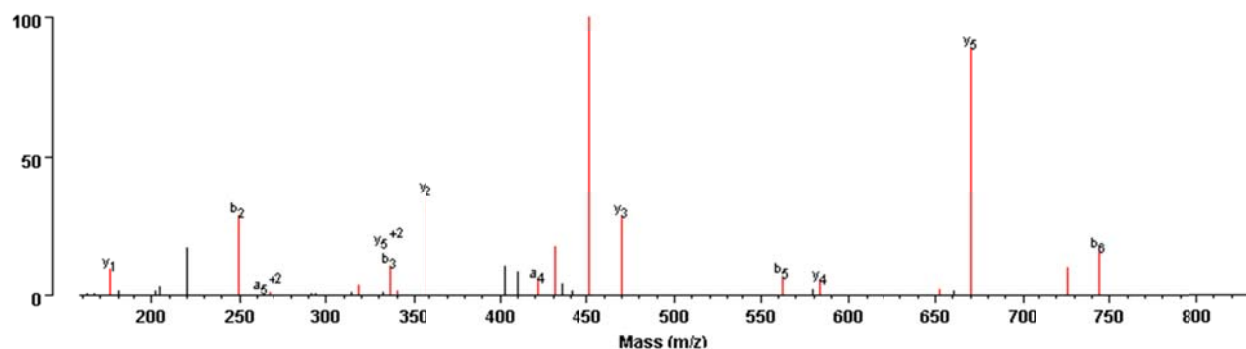

| m/z     | Ion Type   | Error   |
|---------|------------|---------|
| 158.076 | y-NH3,1,+1 | -0.016  |
| 175.187 | y,1,+1     | 0.068   |
| 249.055 | b,2,+1     | -0.043  |
| 267.153 | a,5,+2     | -0.5    |
| 273.252 | b-NH3,5,+2 | 0.11    |
| 318.244 | b-H2O,3,+1 | 0.12    |
| 336.15  | b,3,+1     | 0.02    |
|         | y,5,+2     | 0.43    |
| 340.319 | y-NH3,2,+1 | 0.12    |
| 357.12  | y,2,+1     | -0.1    |
| 421.241 | a,4,+1     | 0.022   |
| 430.929 | b-H2O,4,+1 | -0.27   |
| 450.99  | MH-H2O,,+2 | 0.23    |
|         | MH-NH3,,+2 | -0.26   |
| 470.267 | y,3,+1     | -0.042  |
| 562.478 | b,5,+1     | 0.18    |
| 583.355 | y,4,+1     | -0.038  |
| 652.469 | y-H2O,5,+1 | 0.055   |
| 670.421 | y,5,+1     | -0.0036 |
| 726.078 | b-H2O,6,+1 | -0.32   |
| 744.292 | b,6,+1     | -0.11   |

# K(XL:B-Alkene)EAPPMEKPEVVK<sup>+3</sup>

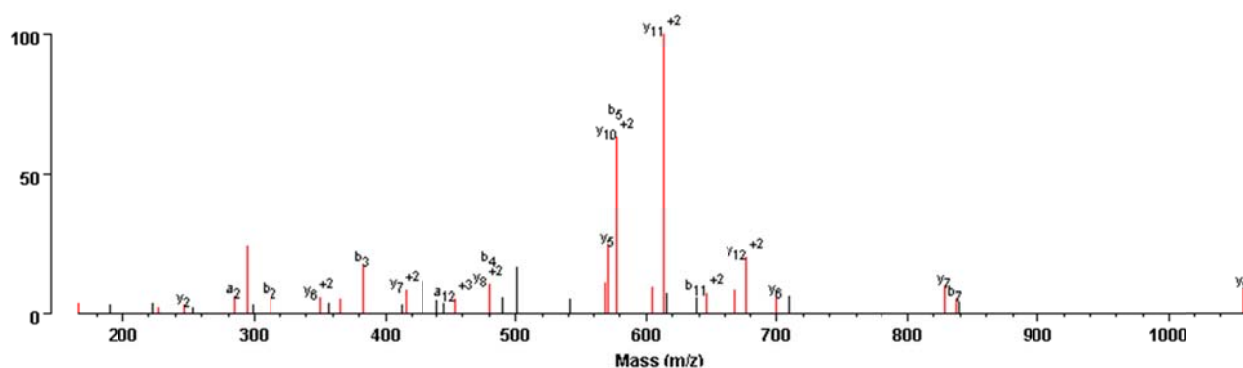

| m/z     | Ion Type    | Error     |
|---------|-------------|-----------|
| 164.872 | y-NH3,3,+2  | 0.26      |
| 227.289 | y-H2O,6,+3  | -0.53     |
| 246.36  | y,2,+1      | 0.18      |
| 284.163 | a,2,+1      | 0.0025    |
| 294.253 | b-H2O,2,+1  | 0.11      |
| 312.034 | b,2,+1      | -0.12     |
| 350.22  | y,6,+2      | -0.0036   |
| 365.071 | b-H2O,3,+1  | -0.11     |
| 383.134 | b,3,+1      | -0.059    |
| 415.063 | y,7,+2      | 0.32      |
| 454.242 | a,12,+3     | -0.33     |
| 480.274 | y,8,+2      | 0.0088    |
|         | b,4,+1      | 0.029     |
| 568.633 | y-NH3,10,+2 | -0.17     |
|         | y-H2O,10,+2 | 0.32      |
| 571.594 | y,5,+1      | 0.25      |
| 577.551 | y,10,+2     | 0.23      |
|         | b,5,+1      | 0.25      |
| 604.295 | y-NH3,11,+2 | -0.028    |
|         | y-H2O,11,+2 | 0.46      |
| 613.046 | y,11,+2     | 0.21      |
| 645.973 | b,11,+2     | 0.15      |
| 668.972 | y-NH3,12,+2 | 0.13      |
| 677.357 | y,12,+2     | -7.70E-04 |
| 699.608 | y,6,+1      | 0.17      |
| 828.085 | y,7,+1      | -0.4      |
| 837.383 | b,7,+1      | 0.0019    |
| 1056.31 | y,9,+1      | -0.27     |
